# Supplementary material for: Design and synthesis of a new series of 3,5-disubstituted-1,2,4-oxadiazoles as potential colchicine binding site inhibitors: antiproliferative activity, molecular docking, and SAR studies
Source: Royal Society of Chemistry journal article supplement (doi:10.1039/d1nj02885e), 2021-01-01

## Design and Synthesis of a New Series of 3,5-Disubstituted-1,2,4-Oxadiazoles as Potential Colchicine Binding Site Inhibitors: Antiproliferative activity, Molecular docking, and SAR Studies

Rana T. Diab<sup>1</sup>, Zakaria K. Abdel-Sami<sup>1</sup>, Eatedal H. Abdel-Aal<sup>1</sup>, Ahmed A. Al-Karmalawy<sup>2\*</sup>, Nader E. Abo-Dya<sup>1,3\*</sup>

<sup>1</sup> Department of Pharmaceutical Organic Chemistry, Faculty of Pharmacy, Zagazig University, Zagazig 44519, Egypt.

<sup>2</sup> Department of Pharmaceutical Medicinal Chemistry, Faculty of Pharmacy, Horus University-Egypt, New Damietta 34518, Egypt.

<sup>3</sup> Department of Pharmaceutical Chemistry, Faculty of Pharmacy, University of Tabuk, Tabuk 71491, Saudi Arabia.

### Corresponding authors:

Ahmed A. Al-Karmalawy: [akarmalawy@horus.edu.eg](mailto:akarmalawy@horus.edu.eg)

Nader E. Abo-Dya: [nader\\_elmaghry88@yahoo.com](mailto:nader_elmaghry88@yahoo.com)

### Contents:

-**Table SII:** 2 D pictures of the binding interactions between the newly synthesized series of 3,5 disubstituted 1,2,4-oxadiazoles (5a-5k) into the colchicine binding site in  $\beta$ -tubulin compared to Col and the docked co-crystallized inhibitor.

- **Figure SII:** Validation of MOE program.

-Spectral data of compounds 5a-k (<sup>1</sup>HNMR, <sup>13</sup>CNMR, and IR).

-Elemental analysis report.

-One dose assay graphs for compounds 5a-k.

-Tubulin polymerization report.

**Table SI1:** 2 D pictures of the binding interactions between the newly synthesized series of 3,5 disubstituted 1,2,4-oxadiazoles (**5a-5k**) into the colchicine binding site in  $\beta$ -tubulin compared to Col and the docked co-crystallized inhibitor.

| No. | Compound | 2 D binding interactions |
|-----|----------|--------------------------|
| 1   | 5a       |                          |
| 2   | 5b       |                          |

|   |    |  |
|---|----|--|
| 3 | 5c |  |
| 4 | 5d |  |
| 5 | 5e |  |

|   |    |  |
|---|----|--|
| 6 | 5f |  |
| 7 | 5g |  |
| 8 | 5h |  |

|    |    |  |
|----|----|--|
| 9  | 5i |  |
| 10 | 5j |  |
| 11 | 5k |  |

|           |                                         |  |
|-----------|-----------------------------------------|--|
| <p>12</p> | <p>Col</p>                              |  |
| <p>13</p> | <p>Docked co-crystallized inhibitor</p> |  |

## Redocked Co-crystallized Inhibitor

2 D

3 D

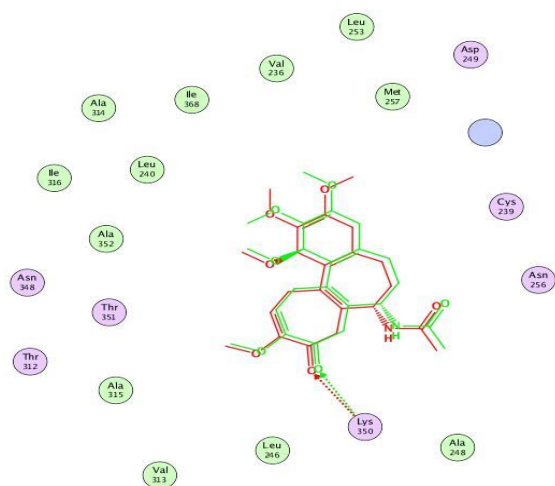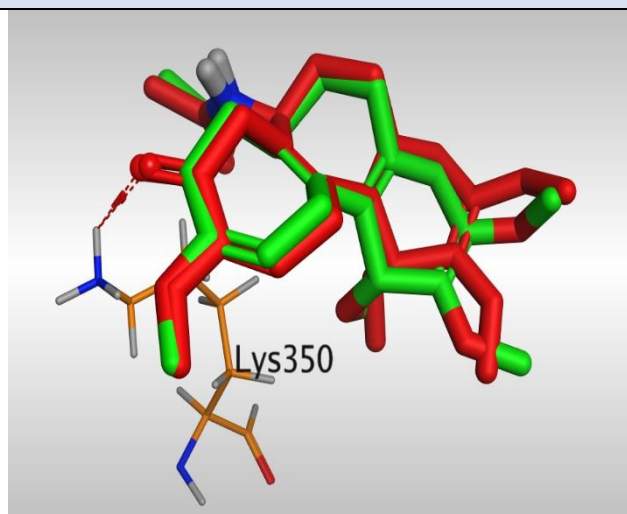

**Figure S11:** 2 D and 3 D representations of the redocking process between the co-crystallized inhibitor (green) and the docked one (red).

# 5a

oxadiazole-1H

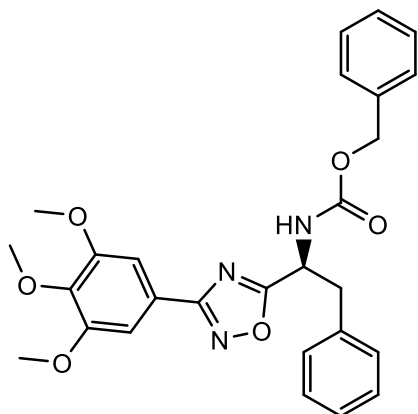

8.355  
8.335  
7.303  
7.297  
7.250  
5.200  
5.185  
5.005  
3.859  
3.745  
3.357

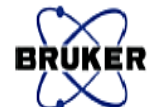

```

Current Data Parameters
=====
NAME: 09-18-2010-10-11-11
EXPNO: 1
PROCNO: 1
F2 - Acquisition Parameters
Date_   : 20101011
Time    : 11.02
INSTRUM : spect
PROBHD  : 5 mm HXBO 51
PULPROG : zgpg30
TD      : 65536
SOLVENT : DMSO
NS      : 16
DS      : 2
SWH     : 6032.820 Hz
FREQ    : 500.136194 MHz
AQ      : 0.122294 sec
RG      : 327.50
WDW     : EM
SS      : 0.000000 sec
LB      : 0.30 Hz
GB      : 0.000000 sec
PC      : 1.0000000 sec
=====
===== CHANNEL f1 =====
NUC1    : 13C
P1      : 13.00
PCPD1   : 12.18999162 sec
F2 - Processing parameters
SI      : 32768
SF      : 500.1360000 MHz
WDW     : EM
SS      : 0.000000 sec
LB      : 0.30 Hz
GB      : 0.000000 sec
PC      : 1.00
    
```

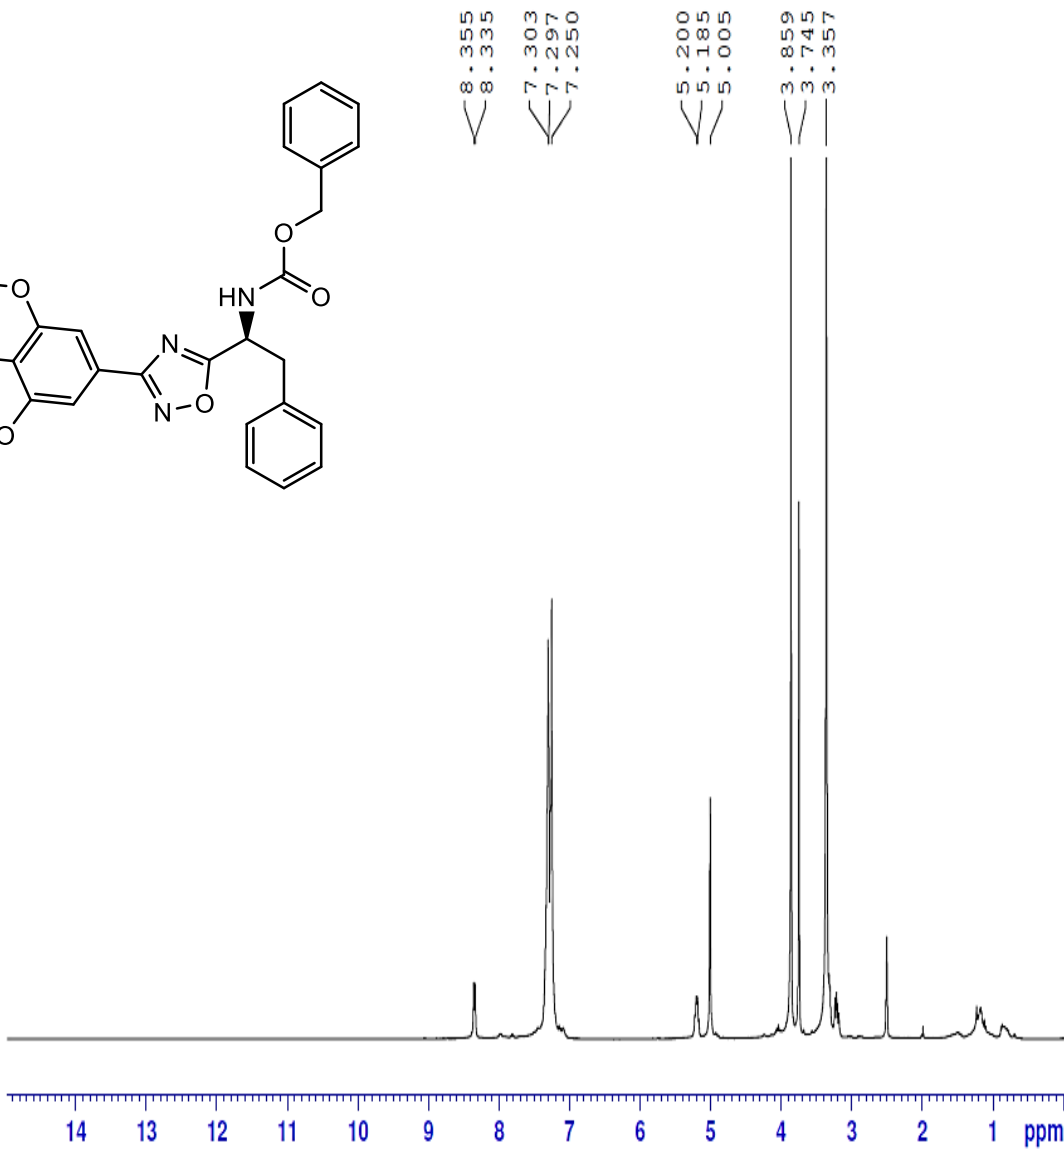

1.00  
15.25  
1.17  
2.24  
6.54  
3.25



# 5a

oxadiazole-13C

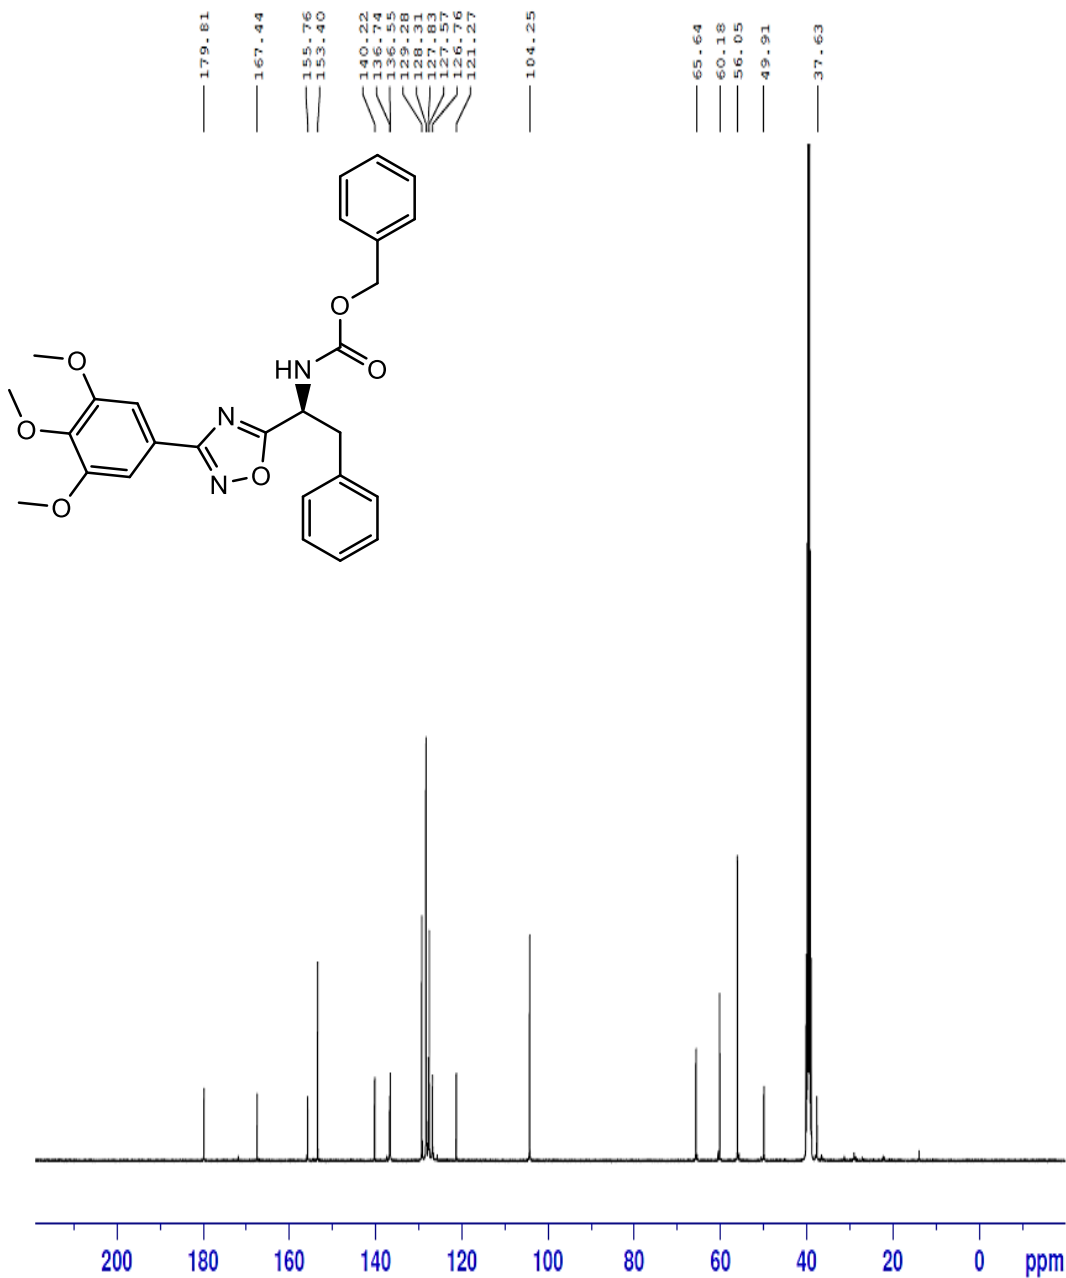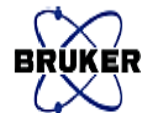

Current Data Parameters  
 NAME: 4r-Methoxy-6-methyl-13C  
 EXPNO: 1  
 PROCNO: 1  
 F2 - Acquisition Parameters  
 Date\_: 20230111  
 Time: 11:14  
 INSTRUM: spect  
 PROBHD: 5 mm HXBO 500  
 PULPROG: zgpg30  
 TD: 65536  
 SFO: 500.136  
 AQ: 2.00000000  
 RG: 2000  
 SF: 4  
 SWH: 24000.000 Hz  
 FIDRES: 0.0001760 Hz  
 AQ: 1.14111111 sec  
 SC: 200.00  
 SR: 250.000 MHz  
 CR: 4.00000000  
 TC: 2.00000000 sec  
 TE: 300.2 K  
 DT: 0.00000000 sec  
 D1: 0.00000000 sec  
 D11: 0.00000000 sec  
 T12: 0.00000000 sec  
 T13: 0.00000000 sec  
 ===== CHANNEL f1 =====  
 NU1: 100.6263700 MHz  
 VC1: 140  
 PC1: 10.00000000 sec  
 PWR1: 50.00000000 W  
 ===== CHANNEL f2 =====  
 NU2: 500.1362600 MHz  
 VC2: 10  
 PC2: 10.00000000 sec  
 PWR2: 50.00000000 W  
 PWR3: 10.00000000 W  
 PWR4: 0.00000000 W  
 PWR5: 0.00000000 W  
 F2 - Processing parameters  
 SI: 32768  
 SF: 500.1362600 MHz  
 WHW: 0  
 JLN: 0  
 LG: 0  
 LB: 1.00 Hz  
 GB: 0  
 GC: 1.40



5b

o-amino oxadiazole-13C

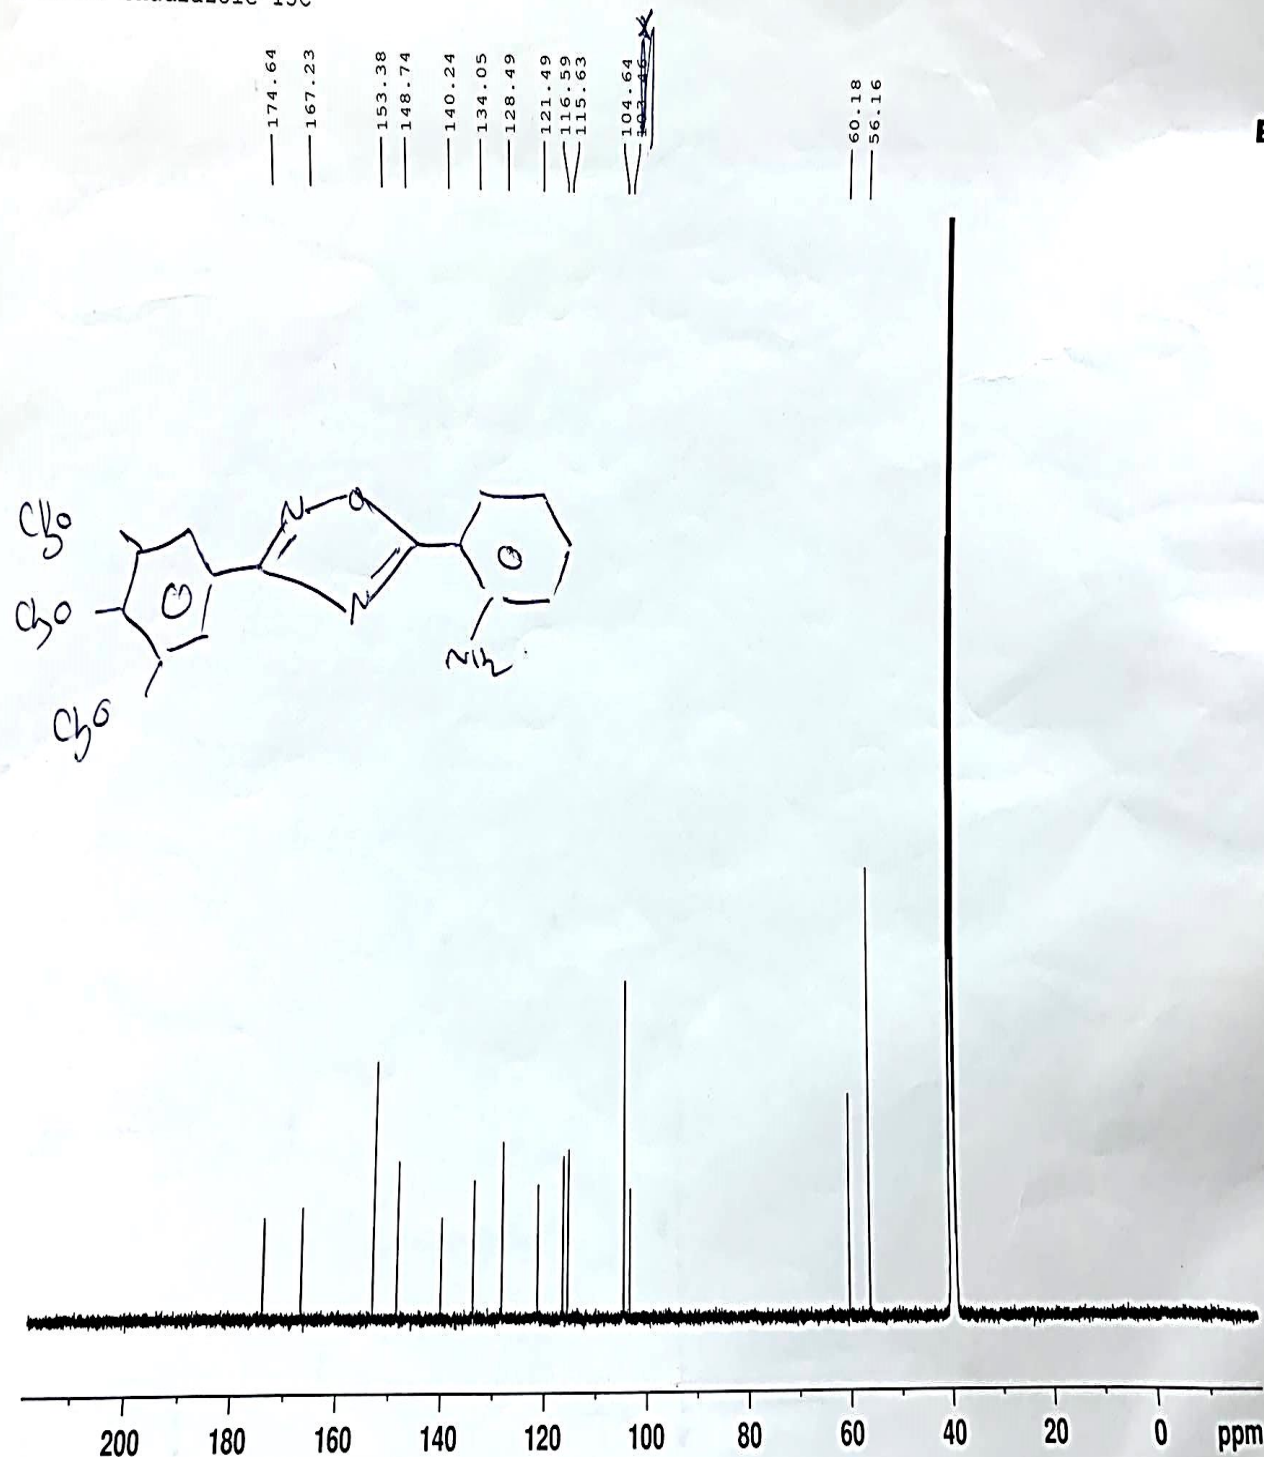

# 5c

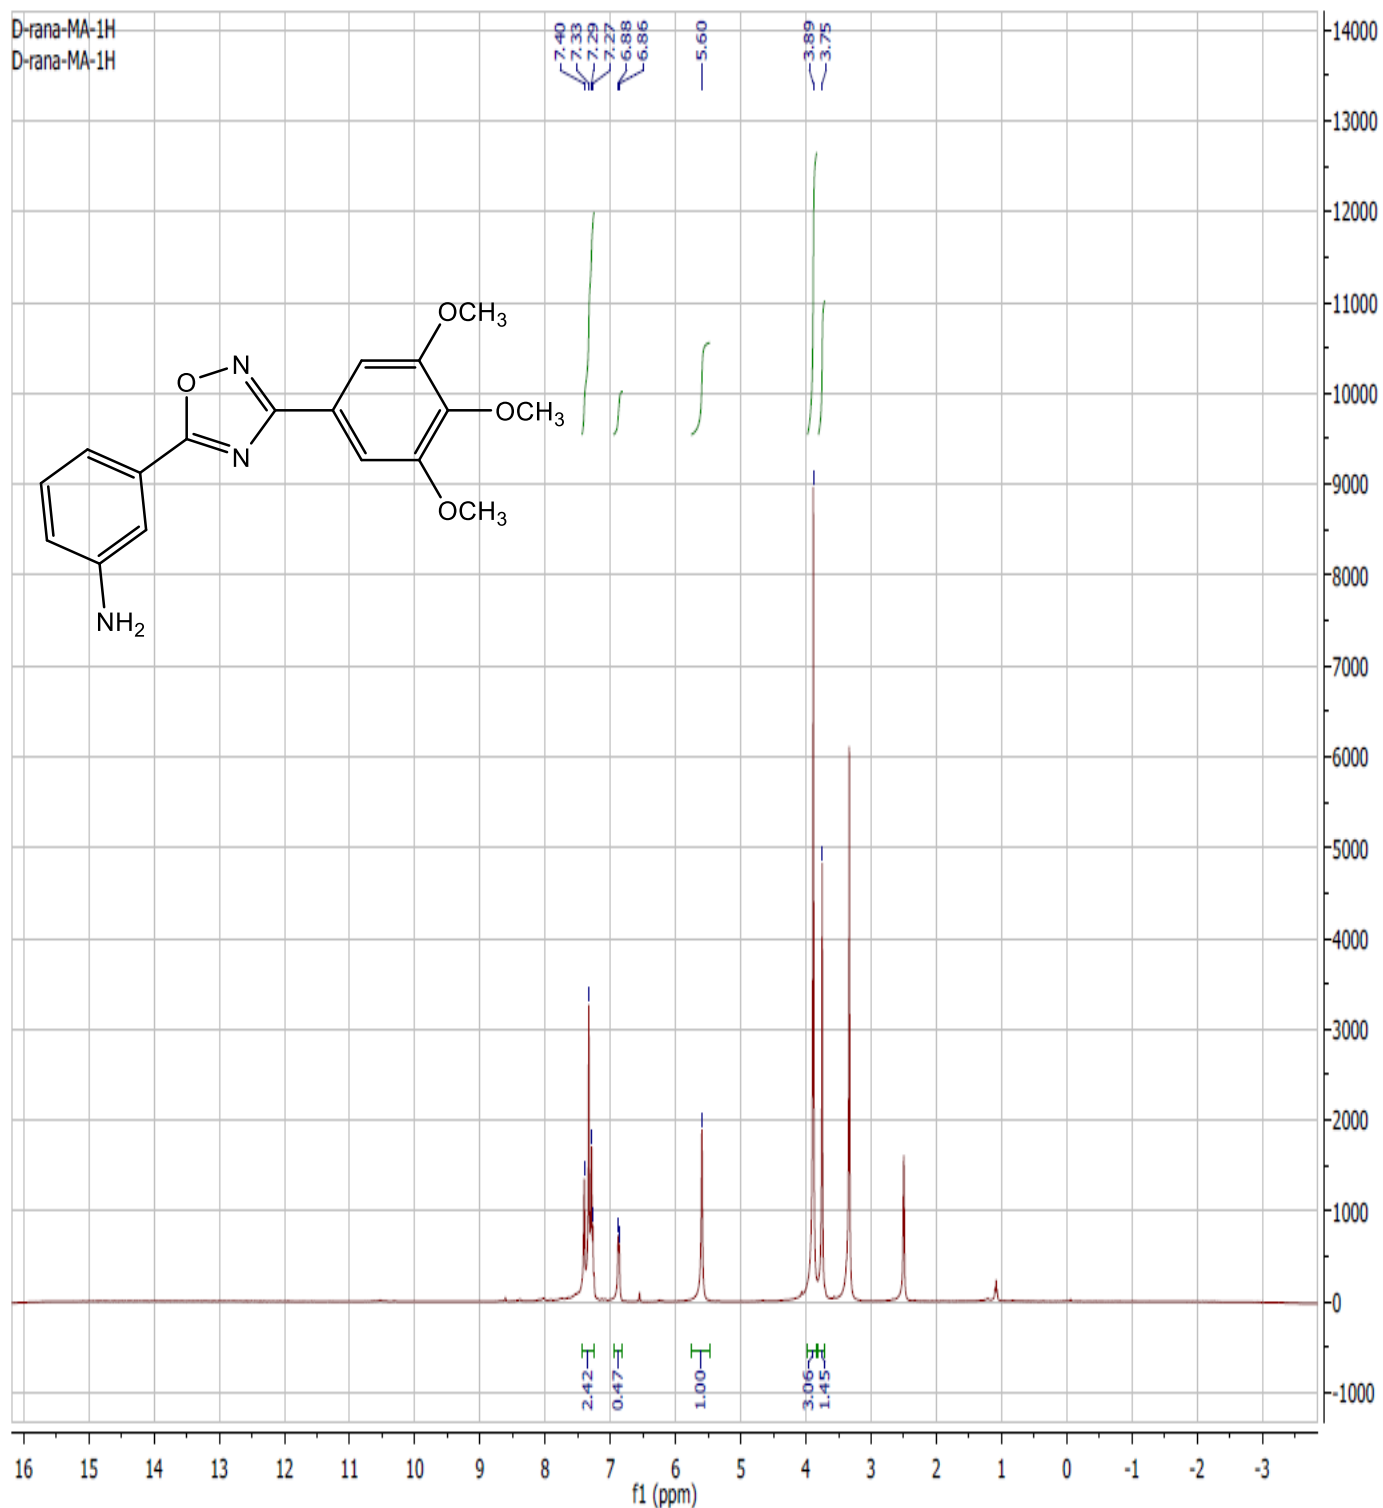

# 5c

D-rana-MA-cl3

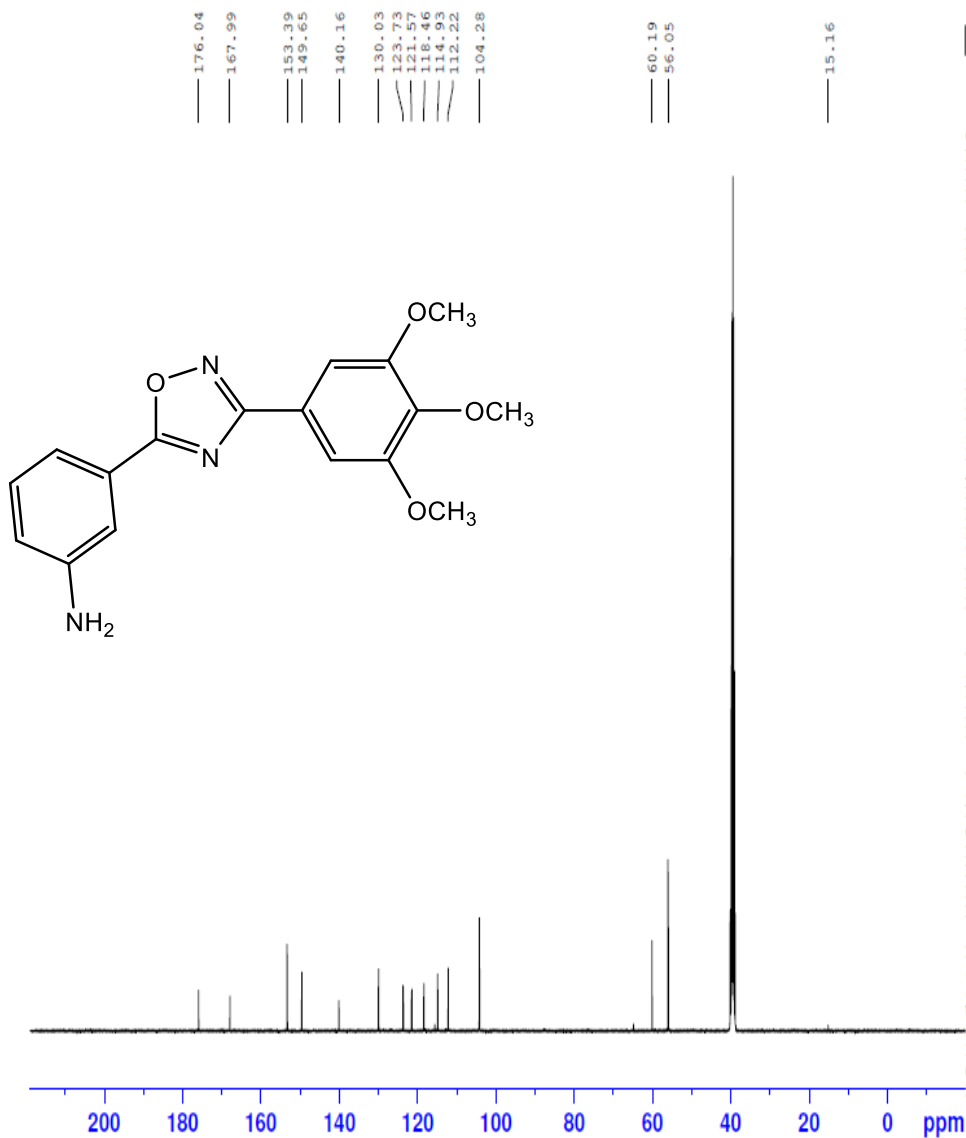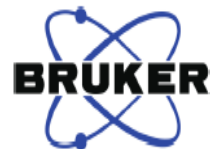

Current Data Parameters  
 NAME D-rana-MA-cl3  
 EXPNO 11  
 PROCNO 1

F2 - Acquisition Parameters  
 Date\_ 20210812  
 Time 9.14  
 INSTRUM spect  
 PROBHD 5 mm PABBO BB/  
 PULPROG zgpg30  
 TD 65536  
 SOLVENT DMSO  
 NS 3000  
 DS 4  
 SWH 24038.461 Hz  
 FIDRES 0.366798 Hz  
 AQ 1.3631488 sec  
 RG 201.61  
 DW 20.800 usec  
 DE 6.50 usec  
 TE 298.1 K  
 D1 2.00000000 sec  
 D11 0.03000000 sec  
 TDO 1

----- CHANNEL f1 -----  
 SFO1 100.6228293 MHz  
 NUC1 13C  
 P1 10.00 usec  
 PLW1 50.00000000 W

----- CHANNEL f2 -----  
 SFO2 400.1316005 MHz  
 NUC2 1H  
 CPDPRG[2] waltz16  
 PCPD2 90.00 usec  
 PLW2 10.39999962 W  
 PLW12 0.28889000 W  
 PLW13 0.23400000 W

F2 - Processing parameters  
 SI 32768  
 SF 100.6128157 MHz  
 WDW EM  
 SSB 0  
 LB 1.00 Hz  
 GB 0  
 PC 1.40

# 5d

P-aminobenzoyl oxadiazole-1H

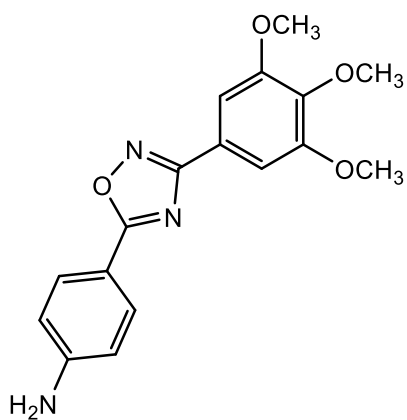

7.849  
7.827  
7.312  
6.717  
6.696  
6.185  
3.876  
3.739  
3.393

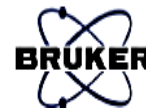

Current Date: 2015/05/26  
NAME: (in full) P-aminobenzoyl oxadiazole-1H  
EXPNO: 1  
PROCNO: 1  
F2 - Acquisition Parameters  
Date\_ 20150526  
Time 13.05  
INSTRUM spect  
PROBHD 5 mm PABBO  
PULPROG zgpg30  
PCPDPRG2  
SI 32768  
SFO 400.141833  
AQ 1.00000000  
RG 655  
SI 16  
SF 400.141833 MHz  
F2 - Processing parameters  
SI 32768  
SF 400.141833 MHz  
AQ 1.00000000  
RG 655  
SI 16  
SF 400.141833 MHz  
PC 1.00

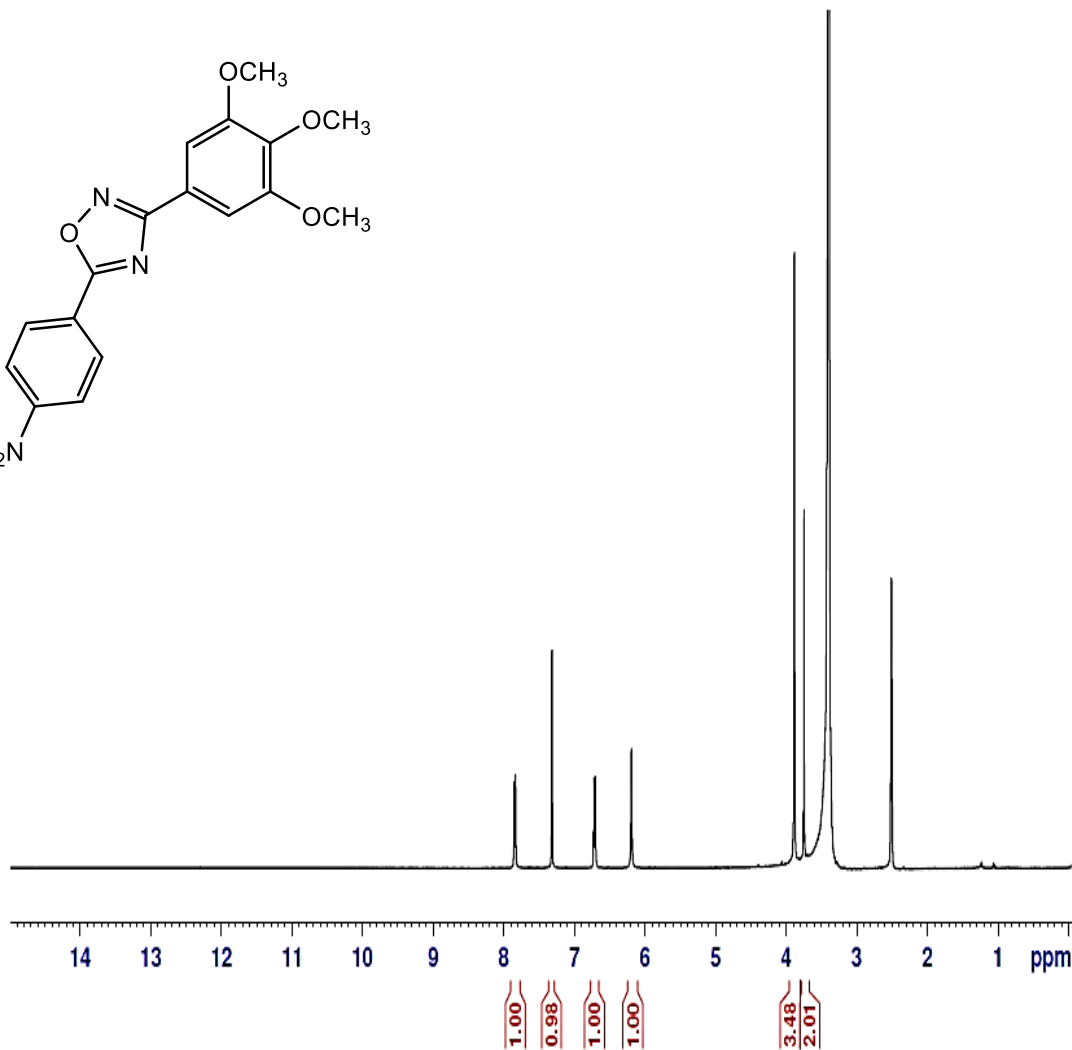

# 5d

P-aminobenzoyl oxadiazole-13C

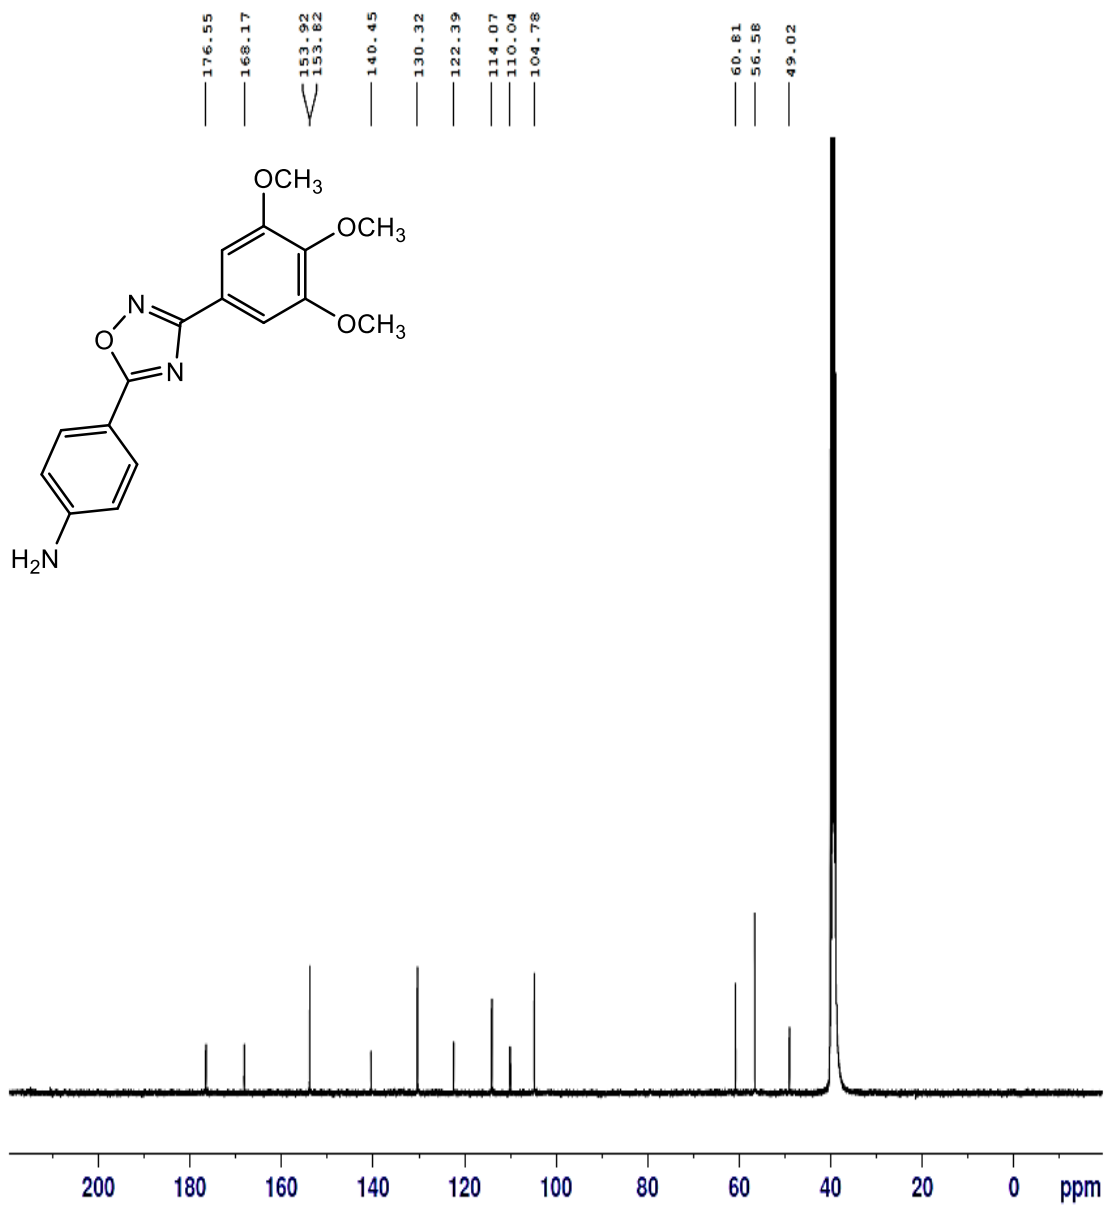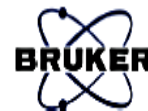

```

=====
Date_   20100101
Time_   10.00
Name_   5d
P1_     12.00
PC_     0.00
PR_     0.00
RG_     327.68
AQ_     0.50
RG2_    327.68
RG3_    327.68
RG4_    327.68
RG5_    327.68
RG6_    327.68
RG7_    327.68
RG8_    327.68
RG9_    327.68
RG10_   327.68
RG11_   327.68
RG12_   327.68
RG13_   327.68
RG14_   327.68
RG15_   327.68
RG16_   327.68
RG17_   327.68
RG18_   327.68
RG19_   327.68
RG20_   327.68
RG21_   327.68
RG22_   327.68
RG23_   327.68
RG24_   327.68
RG25_   327.68
RG26_   327.68
RG27_   327.68
RG28_   327.68
RG29_   327.68
RG30_   327.68
RG31_   327.68
RG32_   327.68
RG33_   327.68
RG34_   327.68
RG35_   327.68
RG36_   327.68
RG37_   327.68
RG38_   327.68
RG39_   327.68
RG40_   327.68
RG41_   327.68
RG42_   327.68
RG43_   327.68
RG44_   327.68
RG45_   327.68
RG46_   327.68
RG47_   327.68
RG48_   327.68
RG49_   327.68
RG50_   327.68
RG51_   327.68
RG52_   327.68
RG53_   327.68
RG54_   327.68
RG55_   327.68
RG56_   327.68
RG57_   327.68
RG58_   327.68
RG59_   327.68
RG60_   327.68
RG61_   327.68
RG62_   327.68
RG63_   327.68
RG64_   327.68
RG65_   327.68
RG66_   327.68
RG67_   327.68
RG68_   327.68
RG69_   327.68
RG70_   327.68
RG71_   327.68
RG72_   327.68
RG73_   327.68
RG74_   327.68
RG75_   327.68
RG76_   327.68
RG77_   327.68
RG78_   327.68
RG79_   327.68
RG80_   327.68
RG81_   327.68
RG82_   327.68
RG83_   327.68
RG84_   327.68
RG85_   327.68
RG86_   327.68
RG87_   327.68
RG88_   327.68
RG89_   327.68
RG90_   327.68
RG91_   327.68
RG92_   327.68
RG93_   327.68
RG94_   327.68
RG95_   327.68
RG96_   327.68
RG97_   327.68
RG98_   327.68
RG99_   327.68
RG100_  327.68
=====
  
```

# 5d

P-aminobenzoyl oxadiazole-D2O

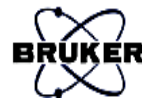

Experiment Name: 5d  
Date: 20120117  
Time: 12:11  
Pulse: zgpg30  
F2: 400.146 MHz  
SOLVENT: DMSO  
PROBHD: 5 mm QNP 1H/13  
P1: 12.00  
PC: 1.00  
PD: 0.00  
TE: 300.2 K  
AQ: 0.39000000  
RG: 655.36  
FIDRES: 0.163319 Hz  
SFO: 400.146000 MHz  
P2: 12.00  
PC: 1.00  
PD: 0.00  
TE: 300.2 K  
AQ: 0.39000000  
RG: 655.36  
FIDRES: 0.163319 Hz  
SFO: 400.146000 MHz

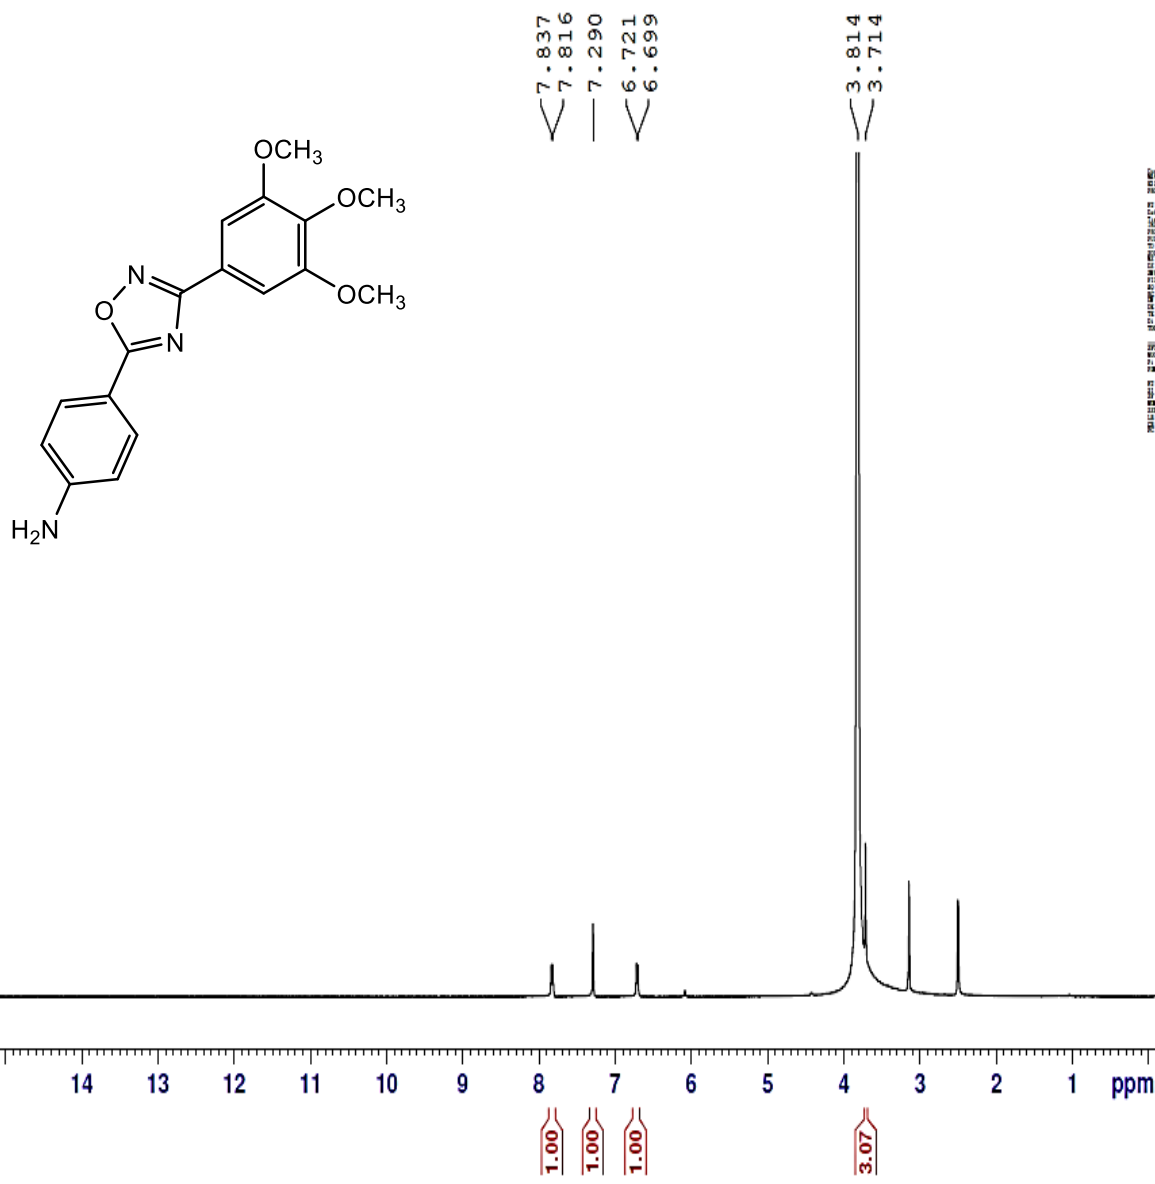



5d

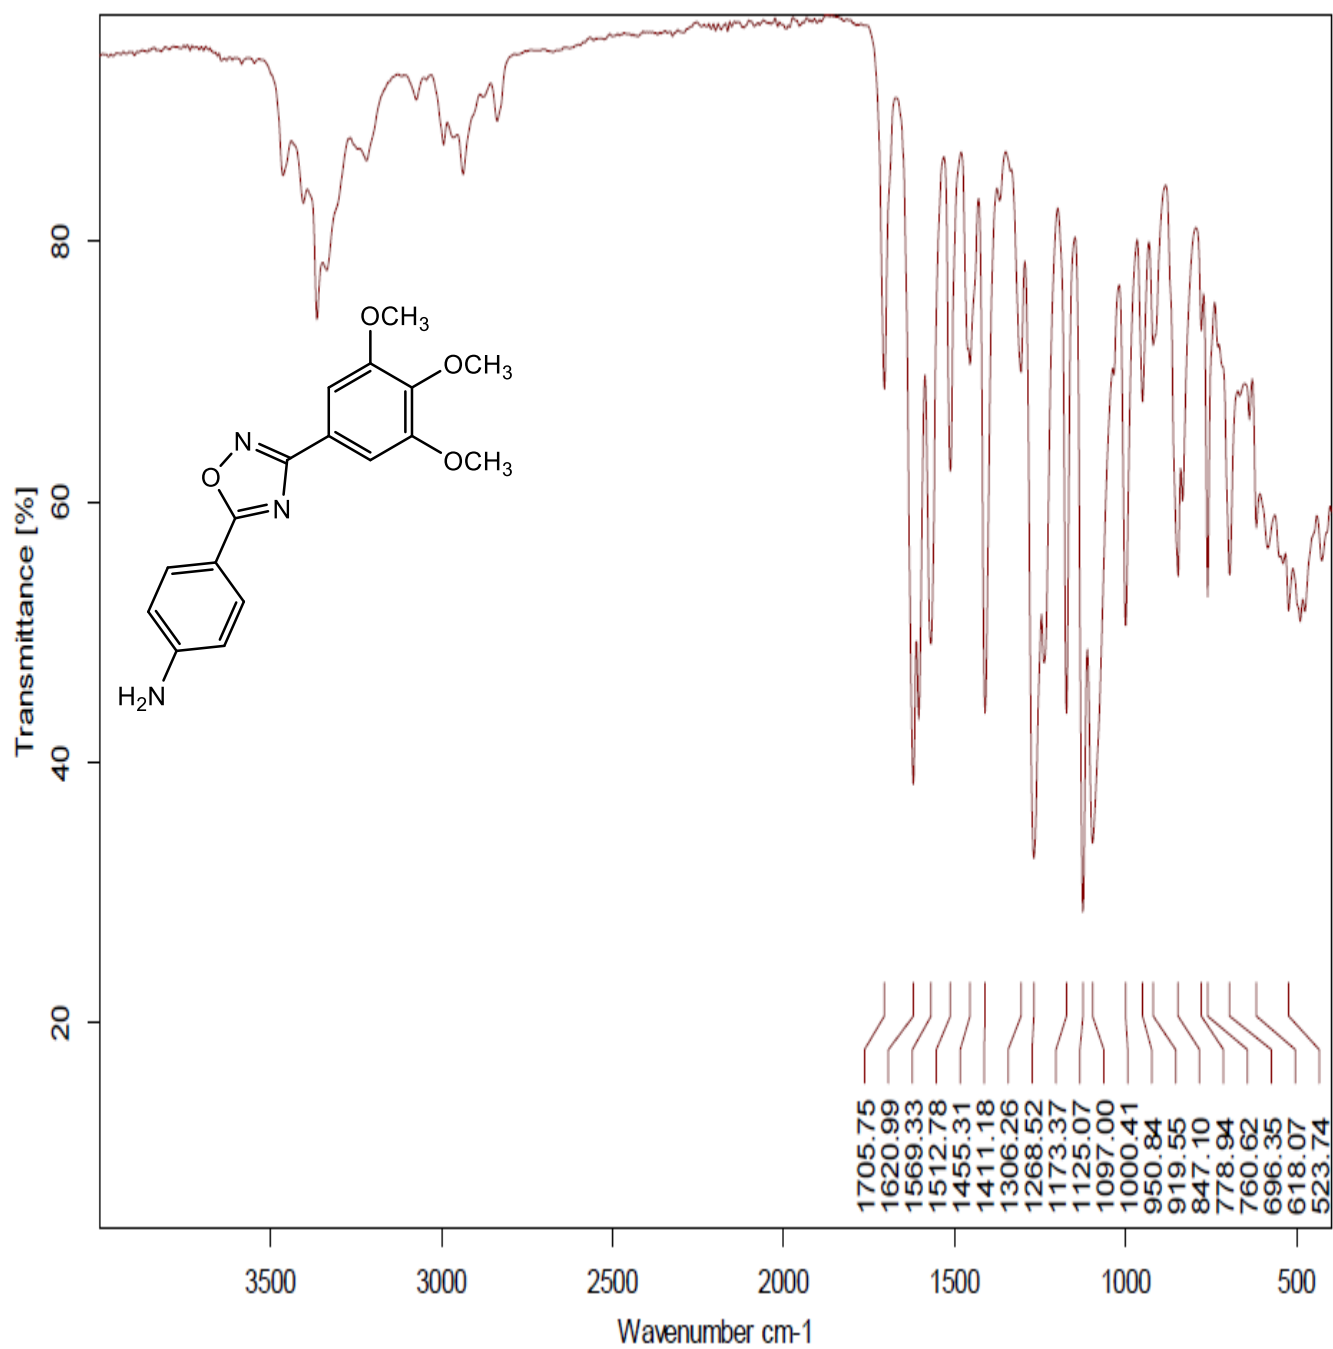

# 5e

Trimethoxy oxadiazole-1H

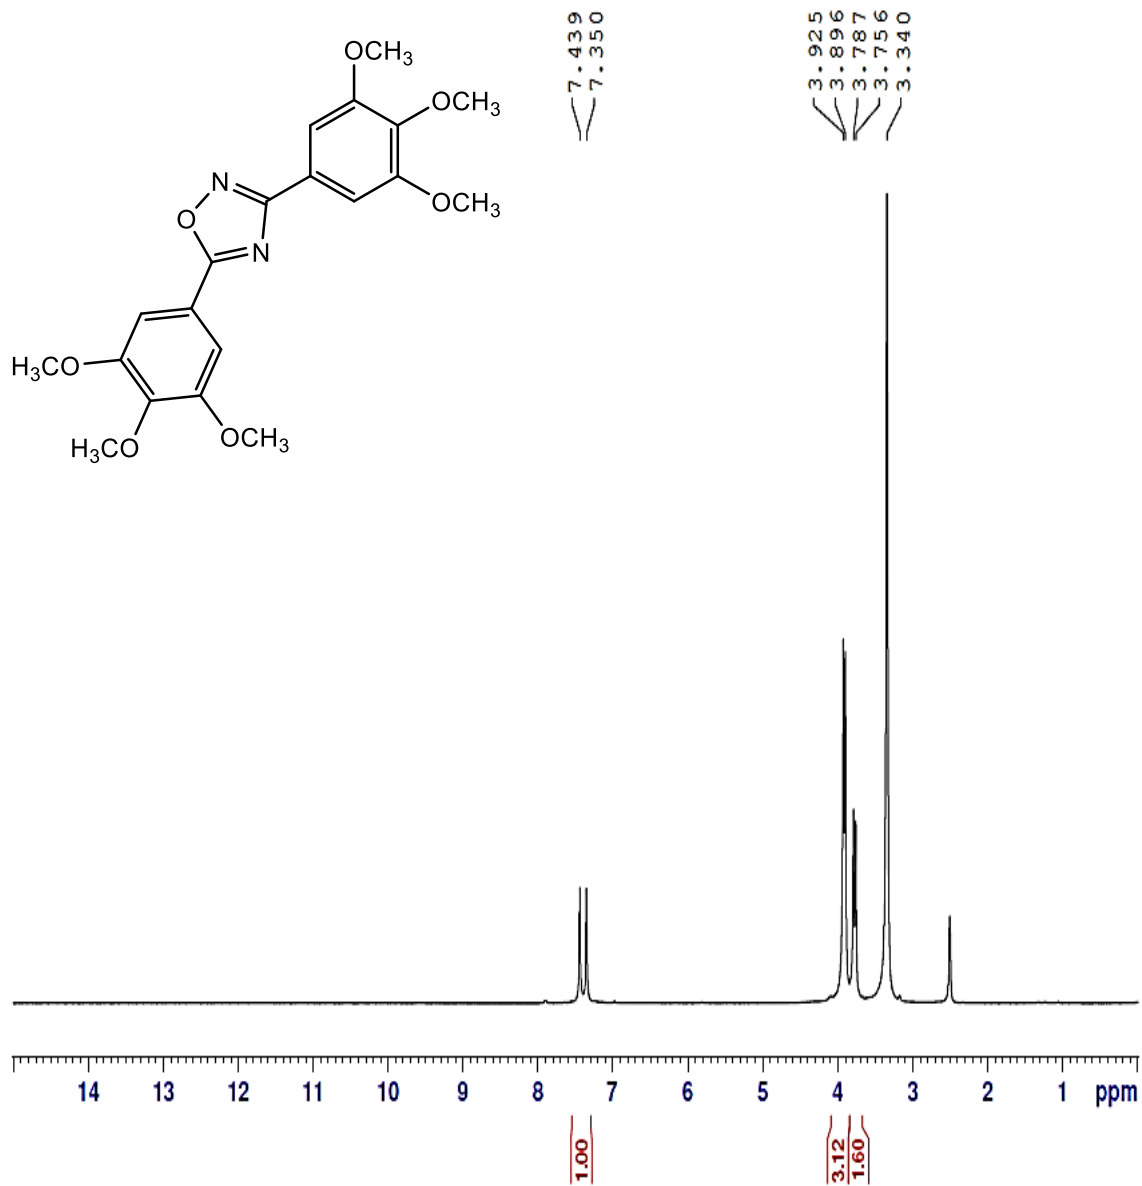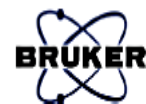

| Chemical Shift (ppm) | Integration |
|----------------------|-------------|
| 7.439                | 1.00        |
| 7.350                | 1.00        |
| 3.925                | 3.12        |
| 3.896                | 1.60        |
| 3.787                |             |
| 3.756                |             |
| 3.340                |             |

# 5e

D-rana-trimethoxy oxadiazole-c13

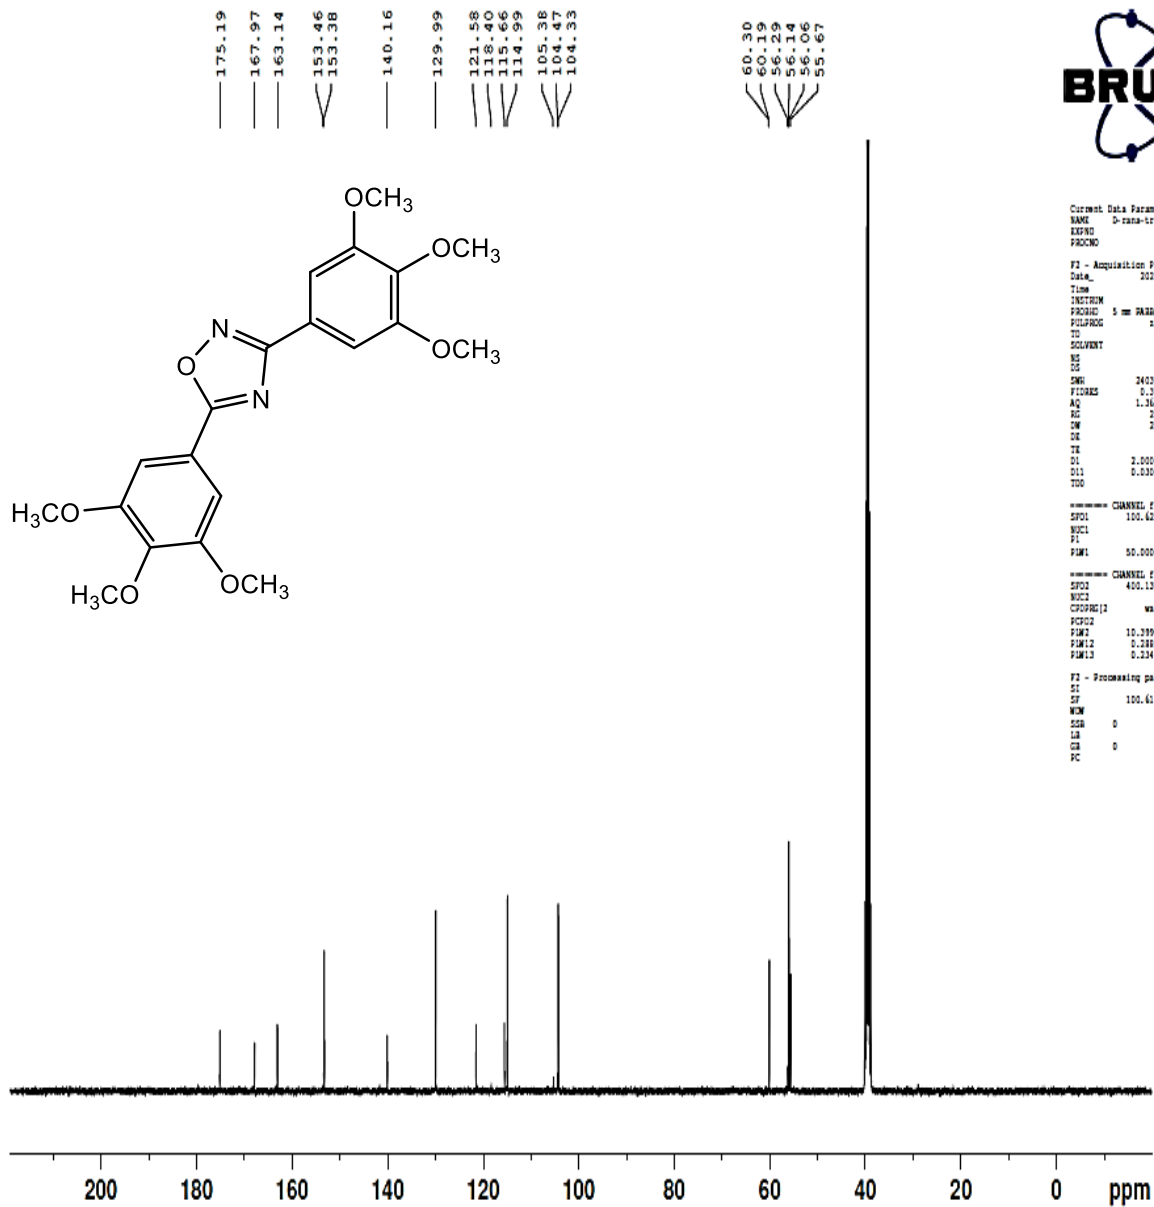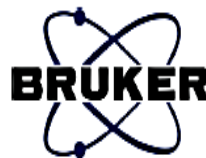

```

Current Data Parameters
NAME  D-rana-trimethoxy oxadiazole-c13
EXPNO  1
PROCNO  1

F2 - Acquisition Parameters
Date_   20200810
Time    12.24
INSTRUM spect
PROBHD  5 mm PABBO 2H/
PULPROG zgpg30
TD      65536
SOLVENT DMCO
NS      1024
DS      4
SWH     24038.461 Hz
FIDRES  0.346798 Hz
AQ      1.3631488 sec
RG      201.61
CW      20.800 umsec
DE      6.50 umsec
TE      300.2 K
D1      2.00000000 sec
D11     0.03000000 sec
TD0     1

===== CHANNEL f1 =====
SFO1   100.628293 MHz
NUC1    13C
P1      10.00 umsec
P1M1   50.00000000 W

===== CHANNEL f2 =====
SFO2   400.1516005 MHz
NUC2    1H
CPCPRG2  waltz16
PCPD2   80.00 umsec
P1M2   10.39999862 W
P1M3   0.26889000 W
P1M4   0.23400000 W

F2 - Processing parameters
SI      32768
SF      100.6128144 MHz
NMW     RM
SSB     0
LB      0
GB      0
PC      1.40
    
```



# 5f

glycine-Oxadiazole-13C

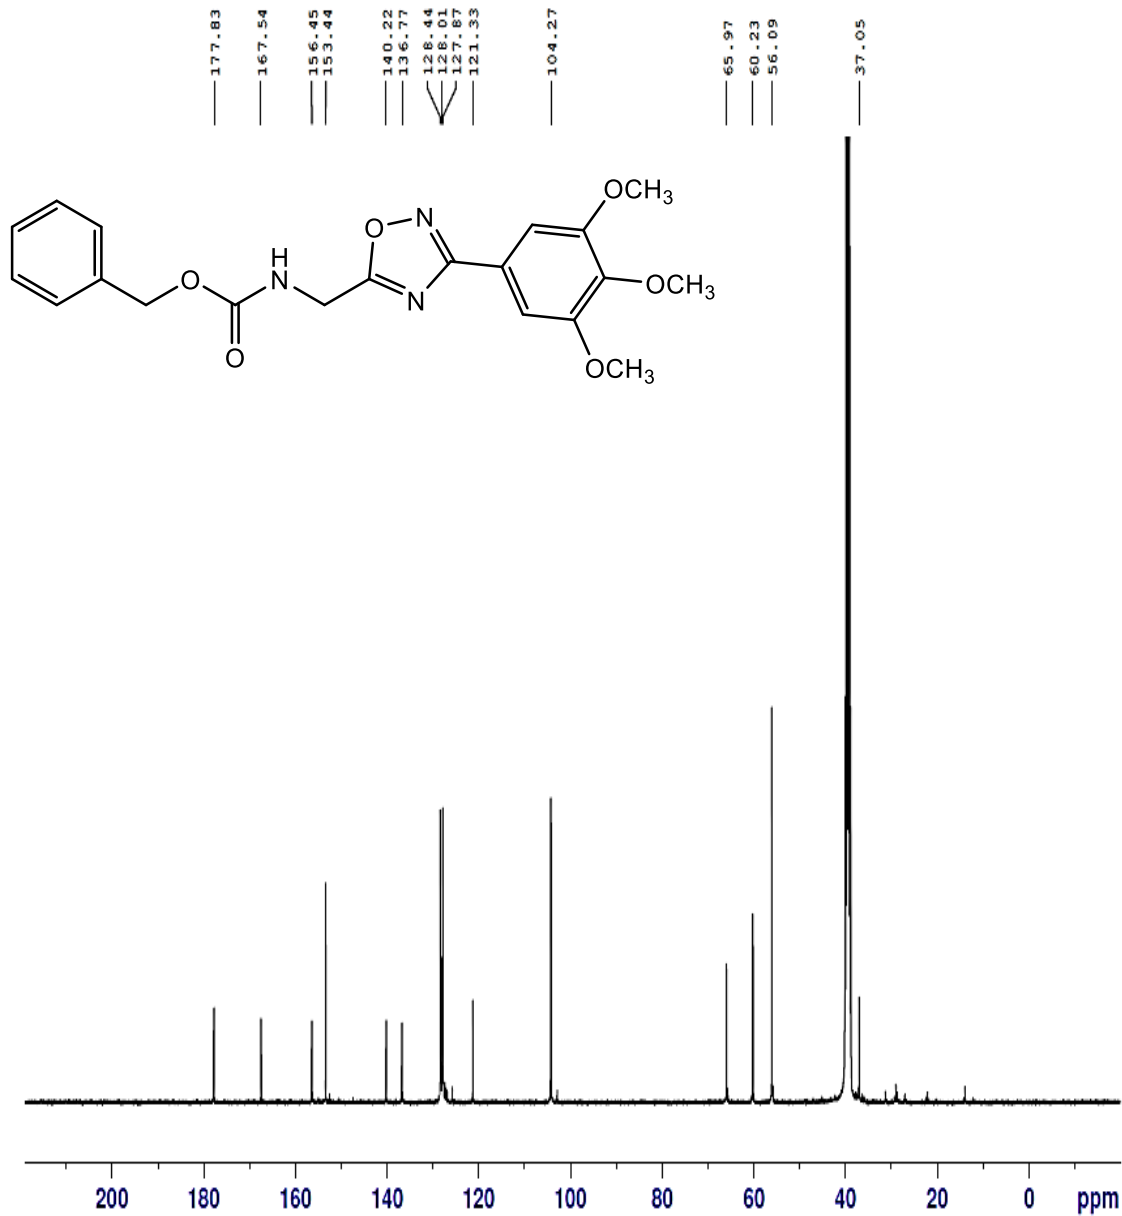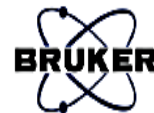

```

Current Data Parameters
NAME: 4m-glycine-Oxadiazole-13C
EXPNO: 12
PROCNO: 1
F2 - Acquisition Parameters
Date_: 20111120
Time: 11:28
INSTRUM: spect
PROBHD: 5 mm PABBO-125
PULPROG: zgpg30
TD: 65536
SOLVENT: DMSO
NS: 2000
DS: 4
SWH: 14031.041 Hz
FIDRES: 0.16176 Hz
AQ: 1.161184 sec
RG: 327.45
CW: 22.022 umm
DE: 0.10 umm
TE: 300.2 K
D1: 2.0000000 sec
d11: 0.0000000 sec
TD0: 1
===== CHANNEL f1 =====
NUC1: 13C-132.90519 MHz
NUC1: 13C
P1: 10.00 umm
P1M1: 10.0000000 Hz
===== CHANNEL f2 =====
XPD: 620.1314025 MHz
NUC2: 1H
COPROG2: waltz16
PCPD2: 40.00 umm
P2M2: 12.18191760 MHz
P2M12: 2.3242020 MHz
P2M13: 0.13420200 MHz
F1 - Processing parameters
SI: 32768
SF: 125.1321025 MHz
RG: 66
AQ: 0
SFO: 125.7613510 MHz
DS: 4
DE: 1.00 mm
CU: 0
VC: 1.40
    
```

5g

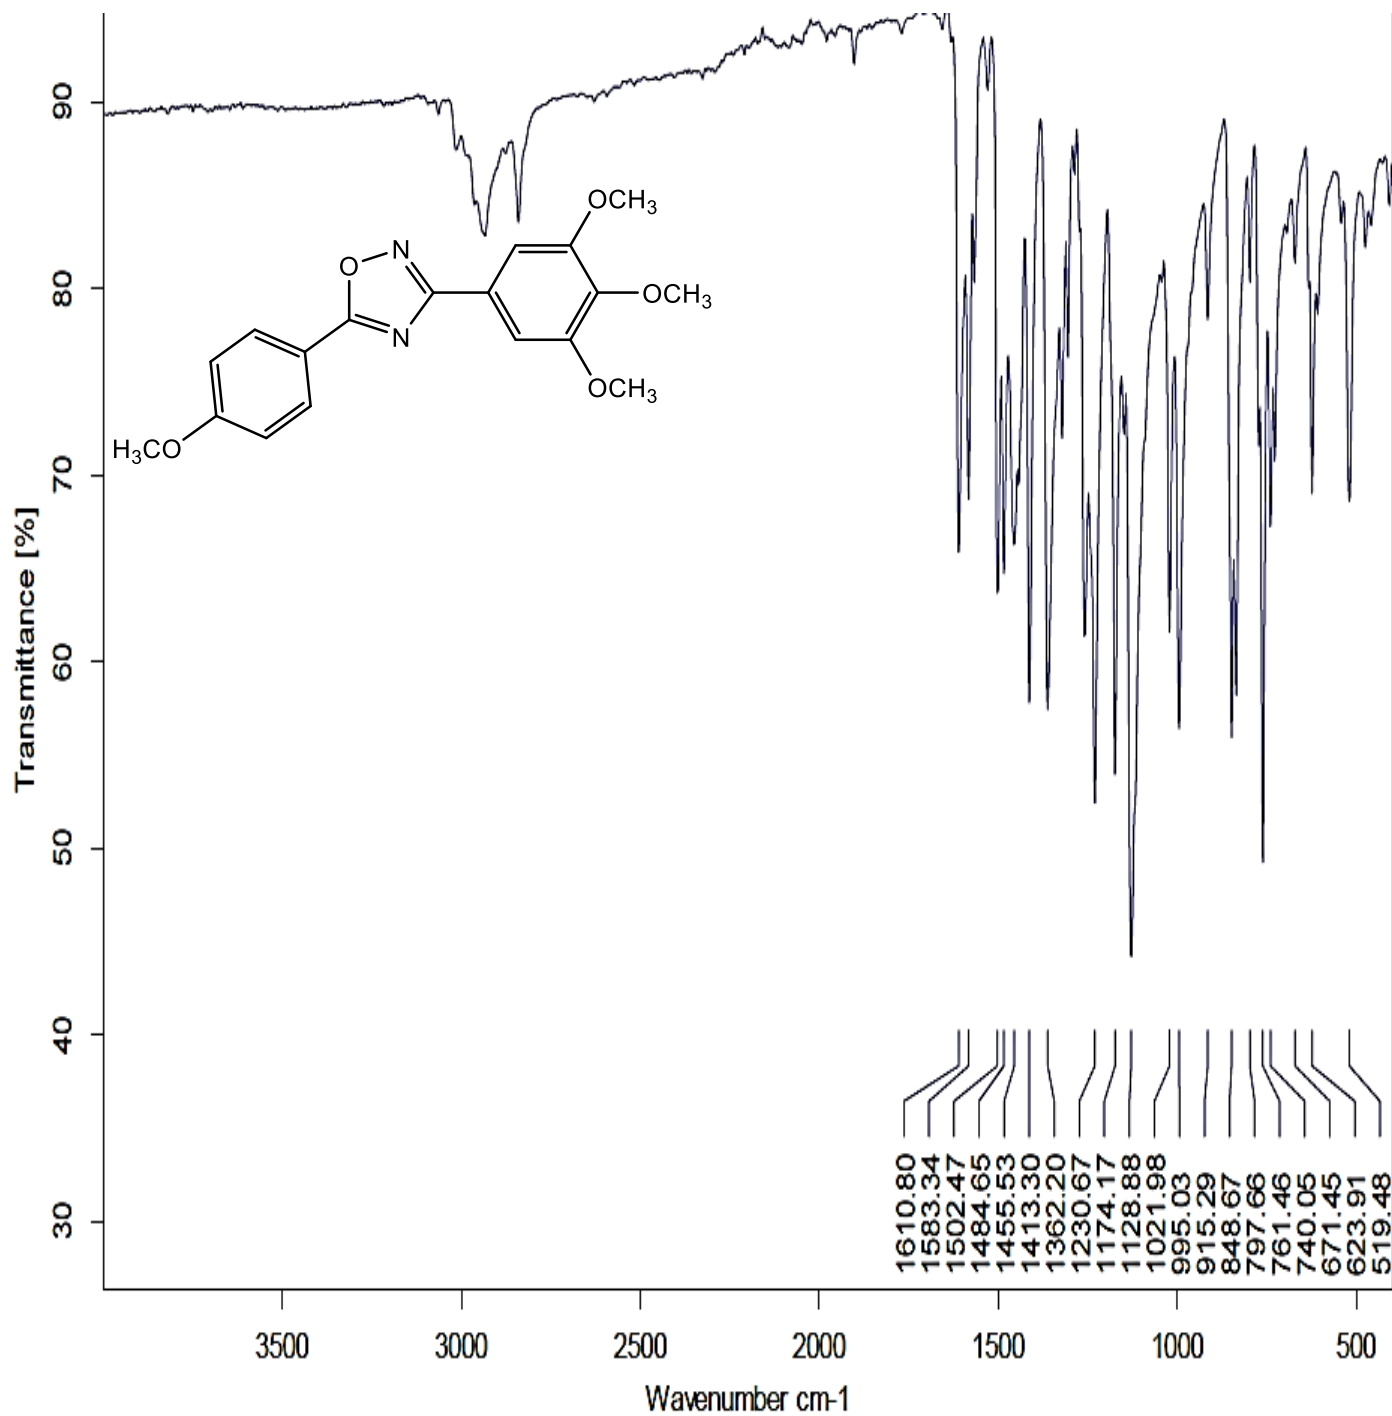

# 5h

Rana Tarek\_H\_Butyric

Microanalytical Unit - FOPCU - NMR laboratory  
www.pharma.cu.edu.eg dir-mau.fopcu@pharma.cu.edu.eg

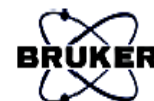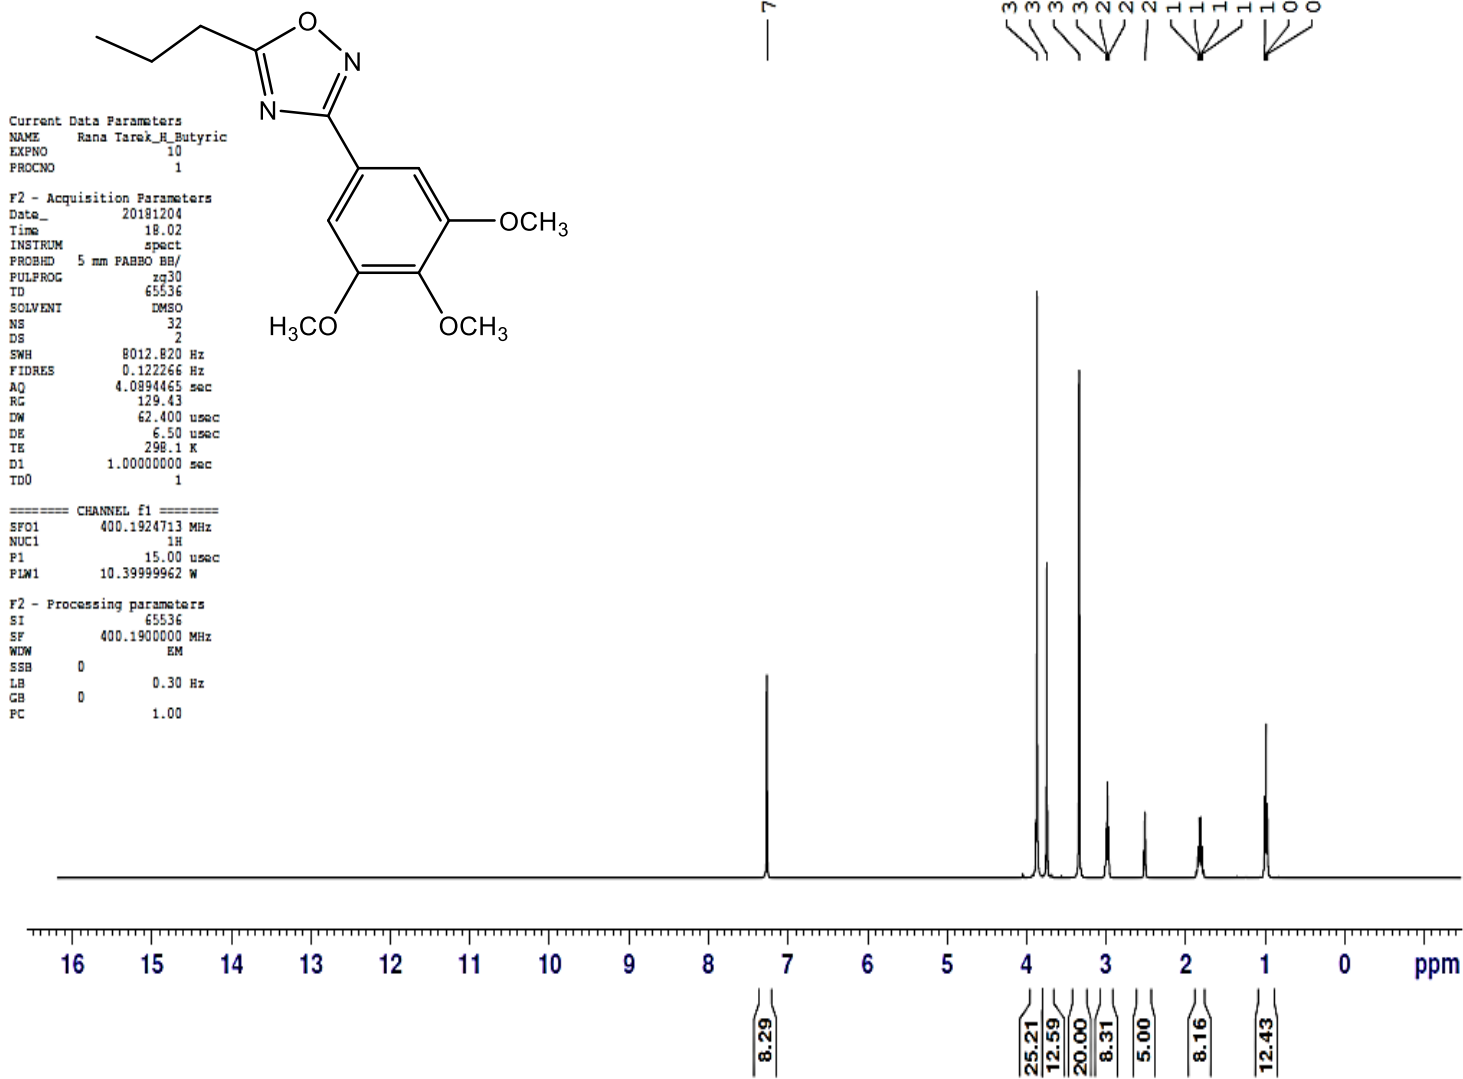

# 5h

D-rana-butyle oxodiazole-c13

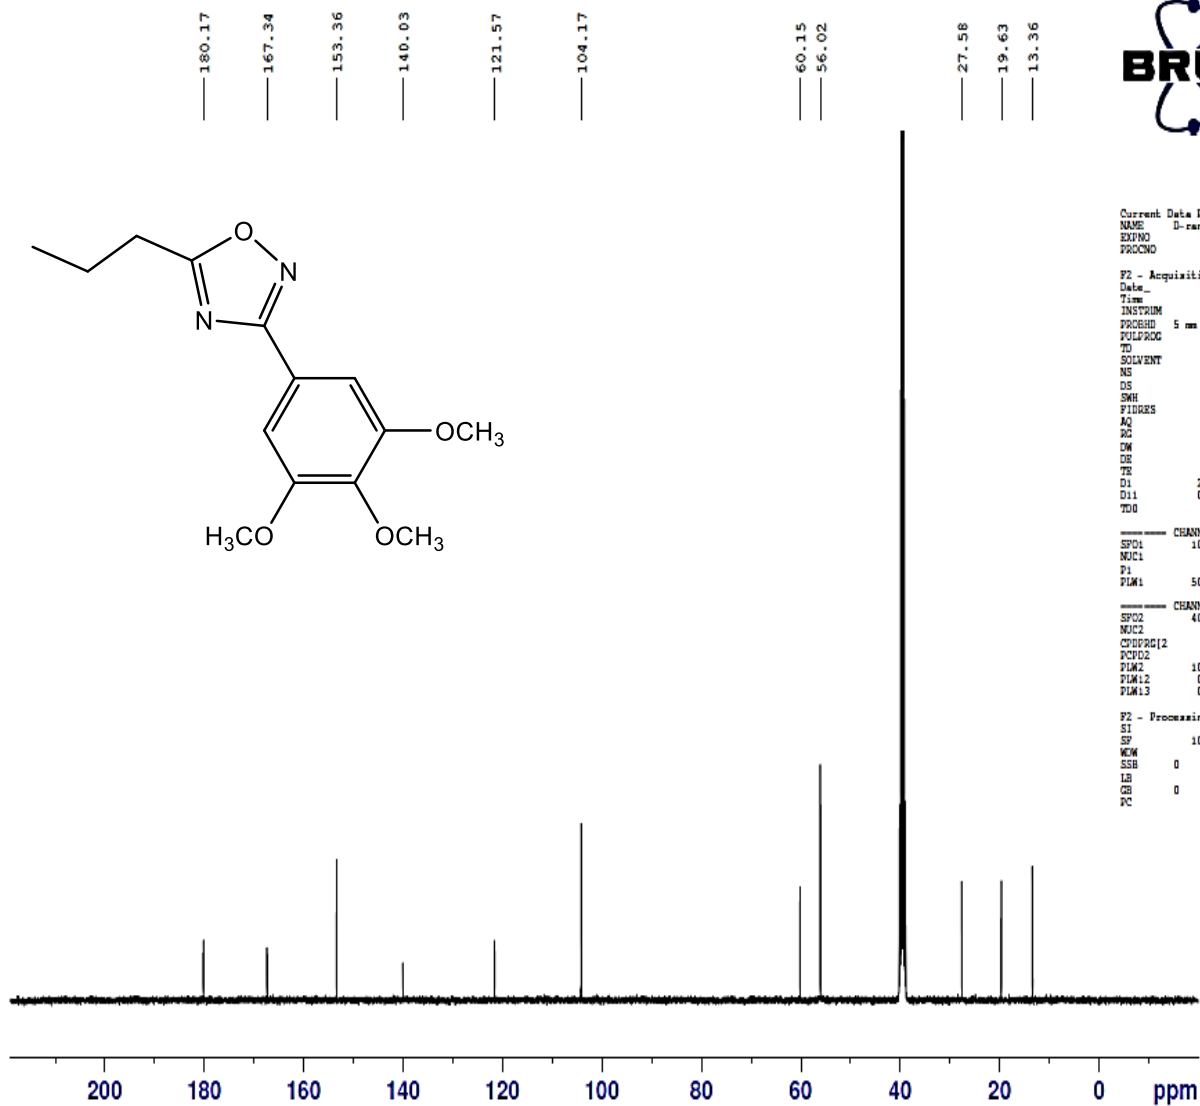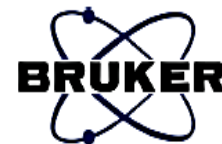

Current Data Parameters  
 NAME D-rana-butyle oxodiazole-c13  
 EXPNO 3  
 PROCNO 1

F2 - Acquisition Parameters  
 Date\_ 20200209  
 Time 23.17  
 INSTRUM spect  
 PROBRD 5 mm PABBO BB/  
 PULPROG zgpg30  
 TD 65536  
 SOLVENT DMSO  
 NS 1024  
 DS 4  
 SWH 24038.461 Hz  
 FIDRES 0.346798 Hz  
 AQ 1.3631488 sec  
 RG 201.61  
 CW 20.800 usec  
 CR 6.50 usec  
 FE 298.2 K  
 D1 2.00000000 sec  
 D11 0.03000000 sec  
 TDO 1

----- CHANNEL f1 -----  
 SFO1 100.6228293 MHz  
 NUCl 13C  
 P1 10.00 usec  
 PLM1 50.0000000 W

----- CHANNEL f2 -----  
 SFO2 400.1316005 MHz  
 NUCl 1H  
 CDDPRG2 waltz16  
 PCDD2 90.00 usec  
 PLM2 10.39999962 W  
 PLM3 0.28899000 W  
 PLM3 0.23400000 W

F2 - Processing parameters  
 SI 32768  
 SF 100.6128168 MHz  
 WDW EM  
 SSB 0  
 LB 1.00 Hz  
 GB 0  
 PC 1.40



# 5i

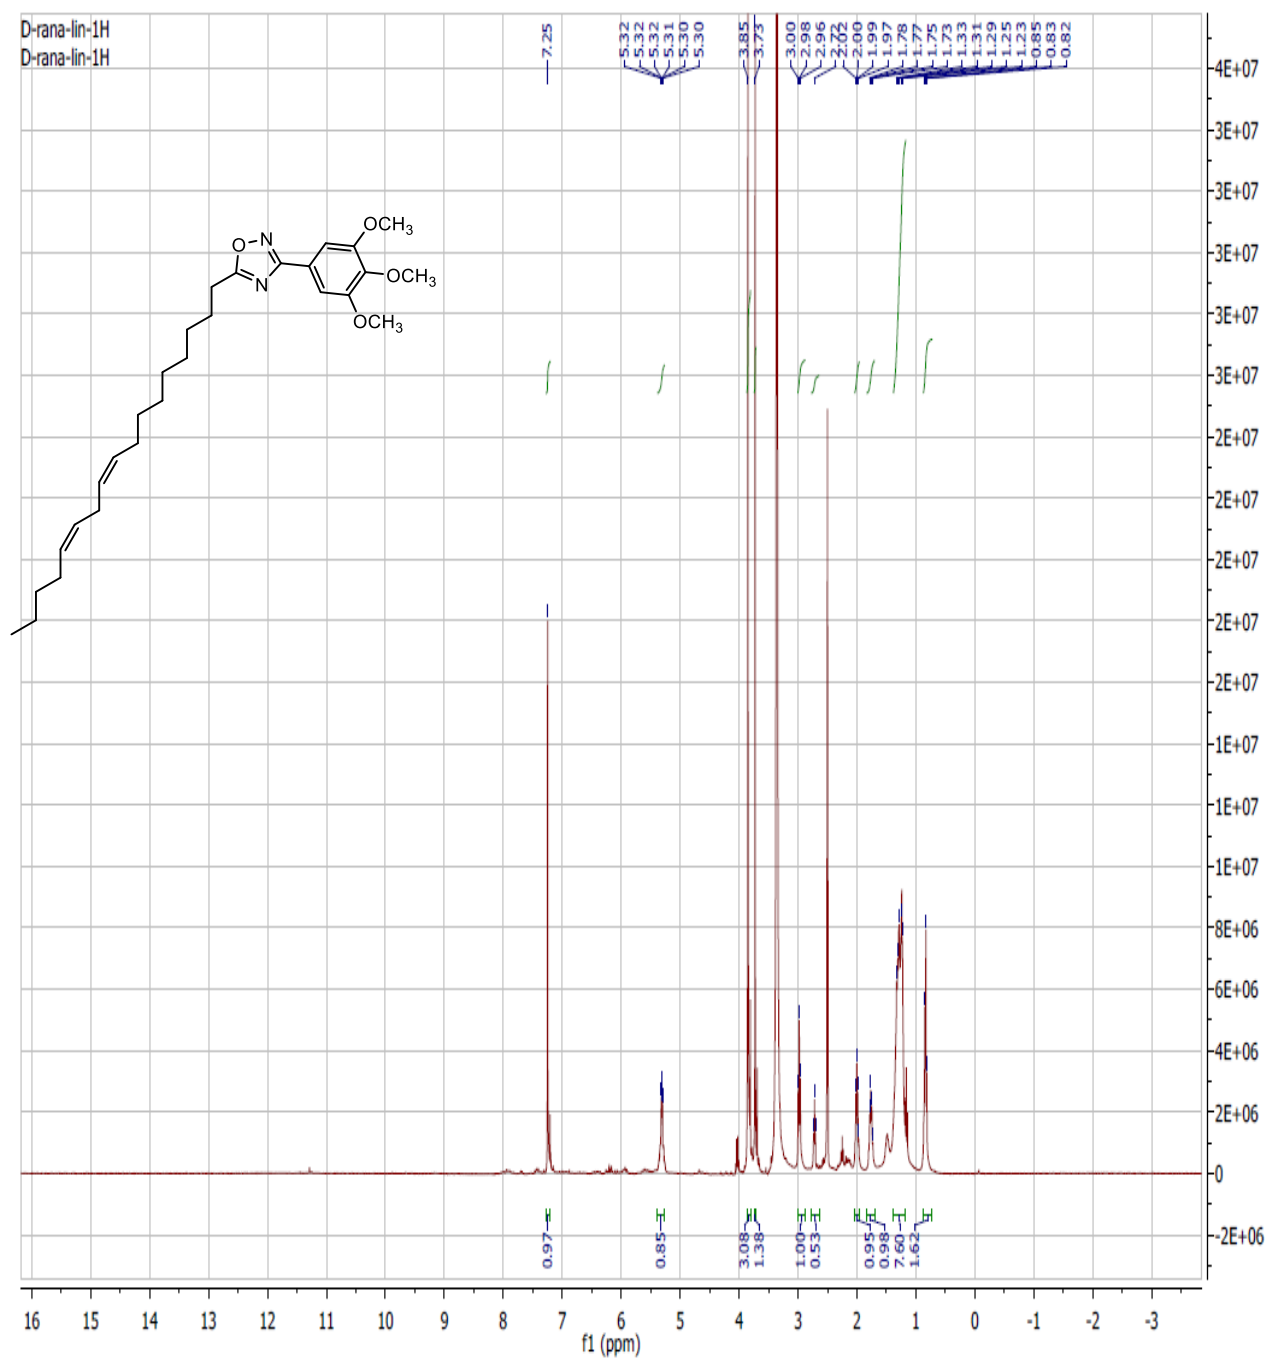

# 5i

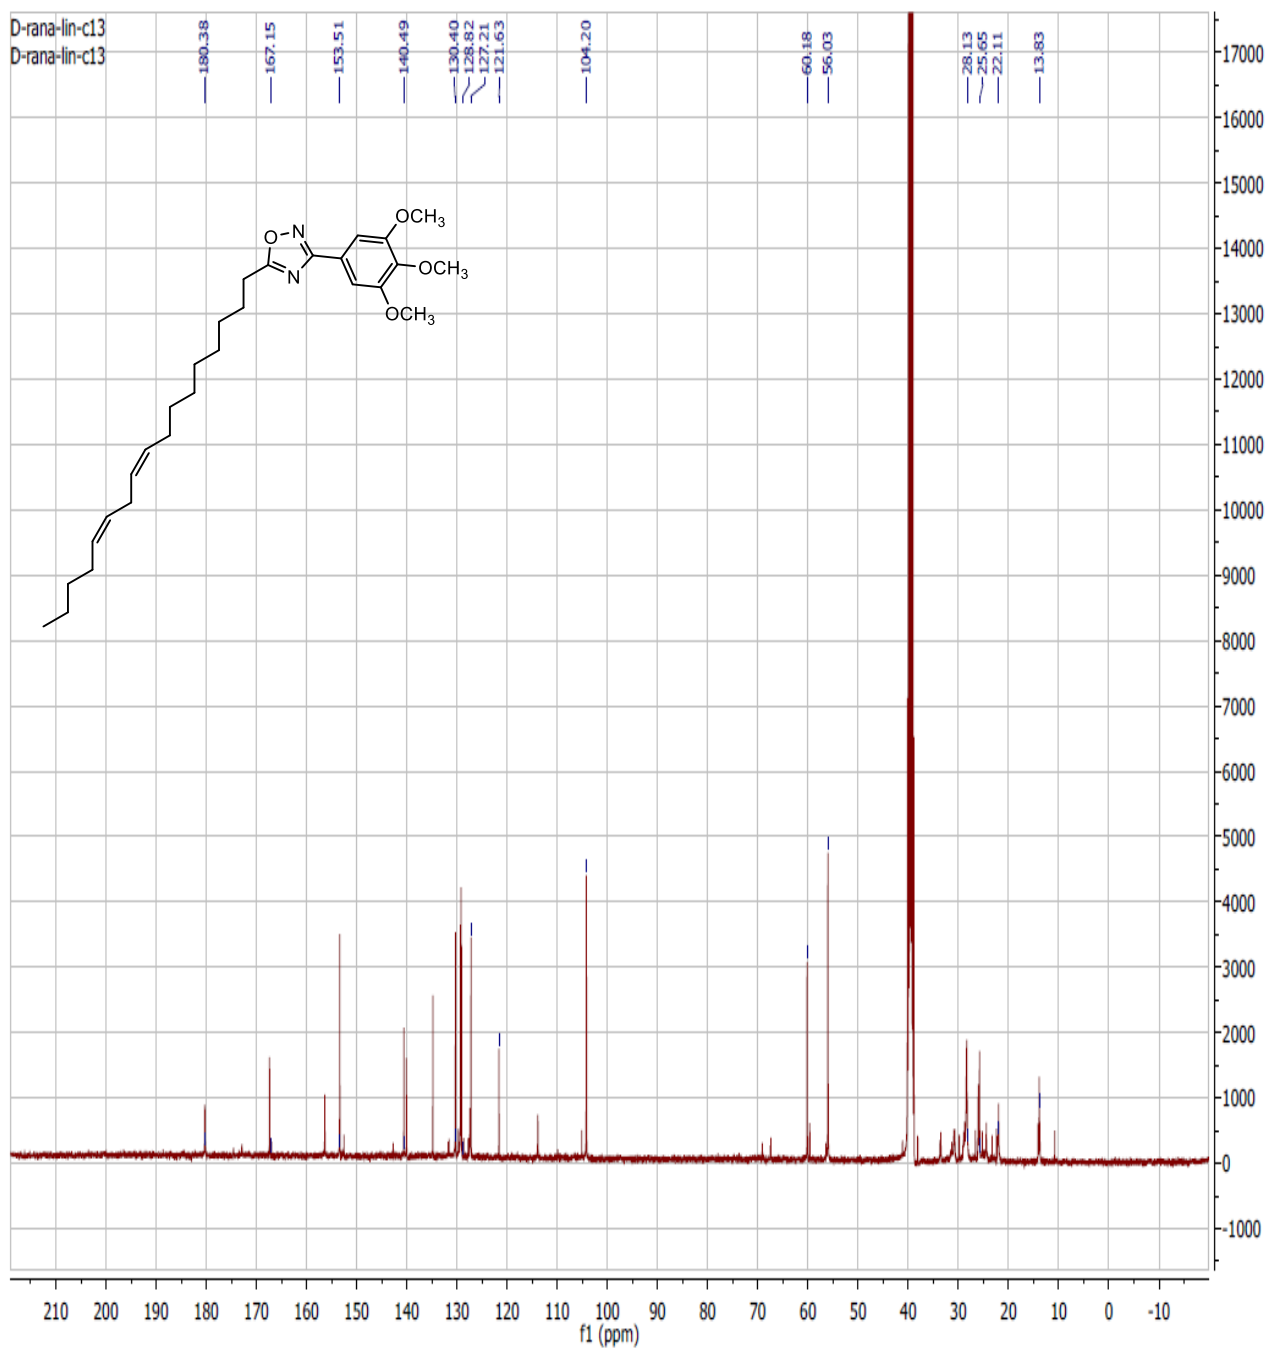

5j

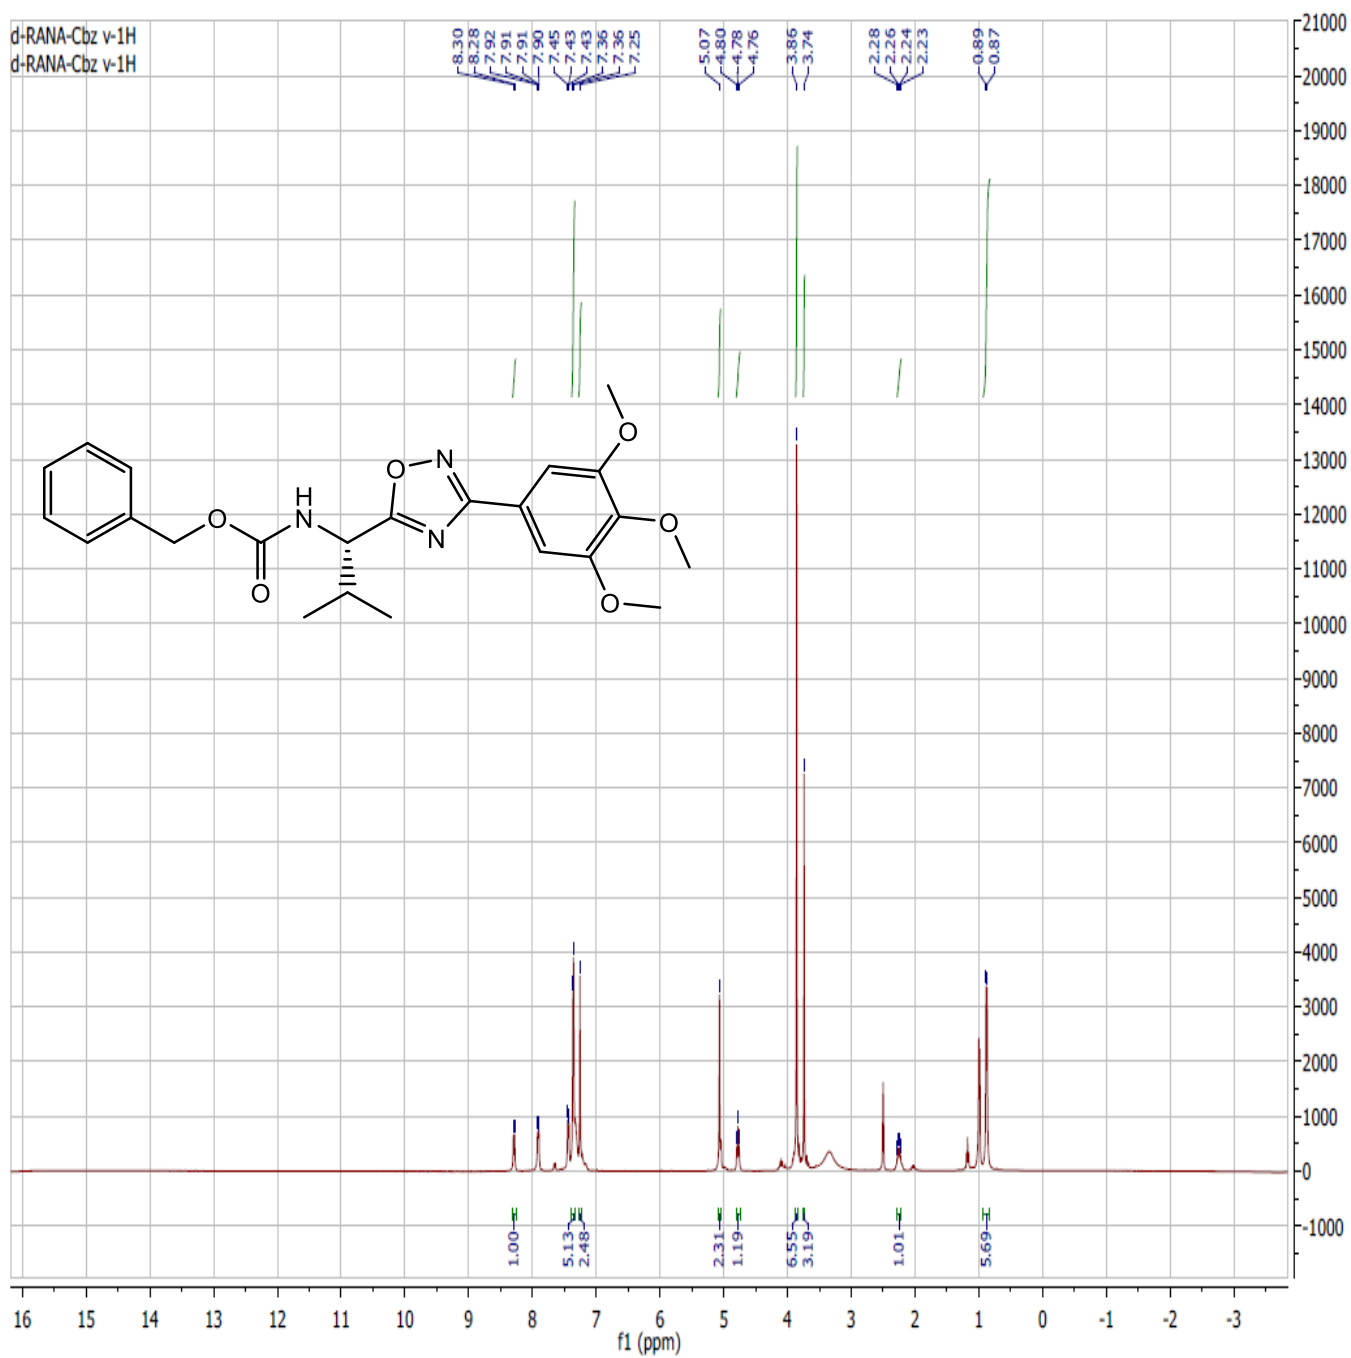

5j

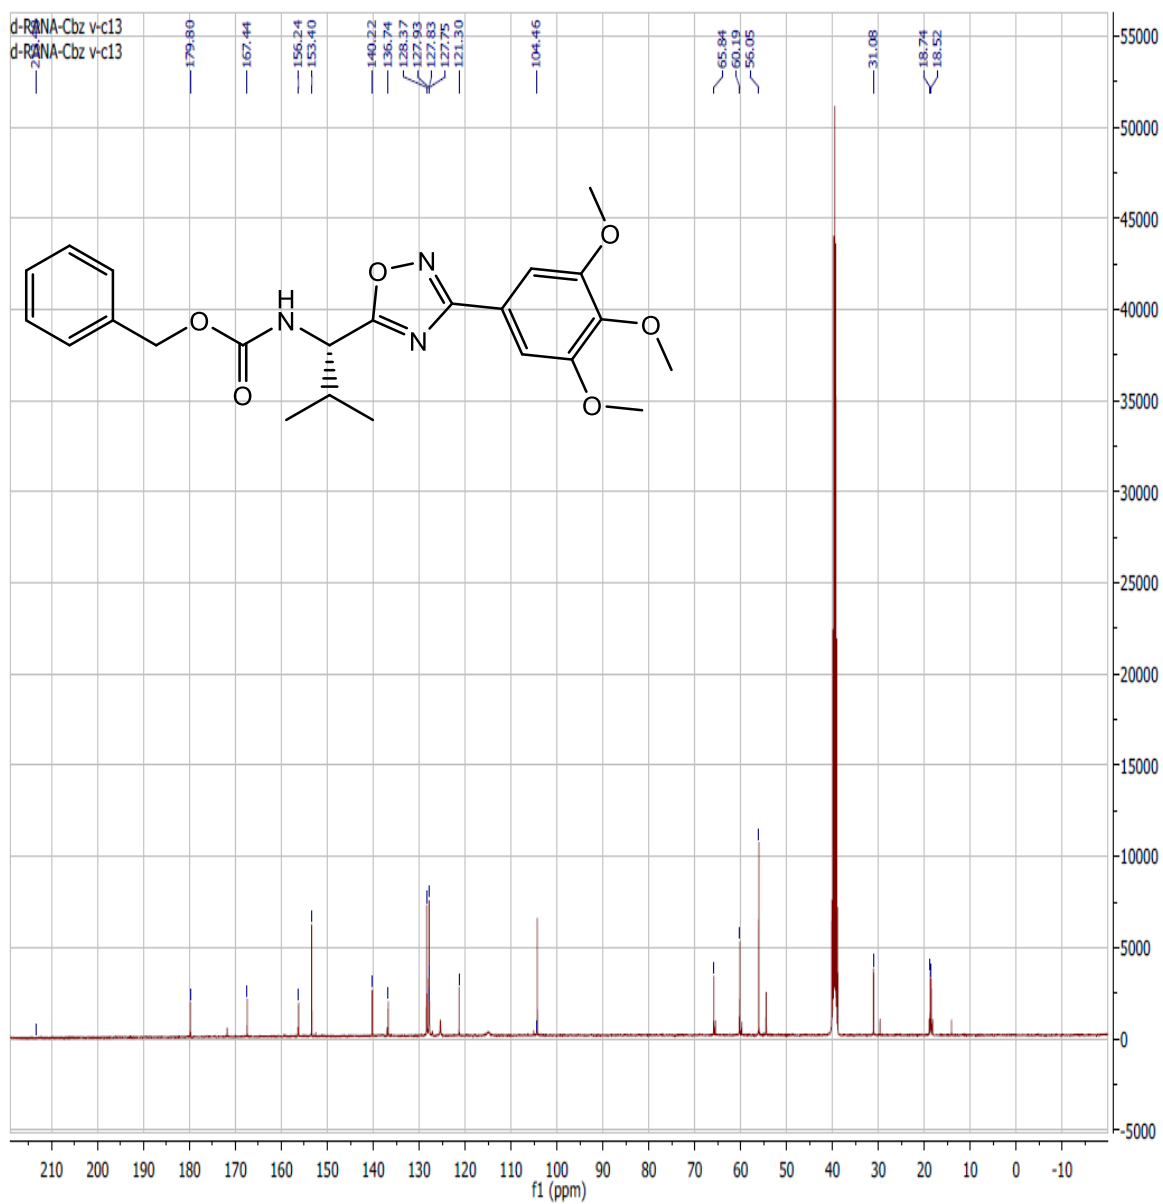

5j

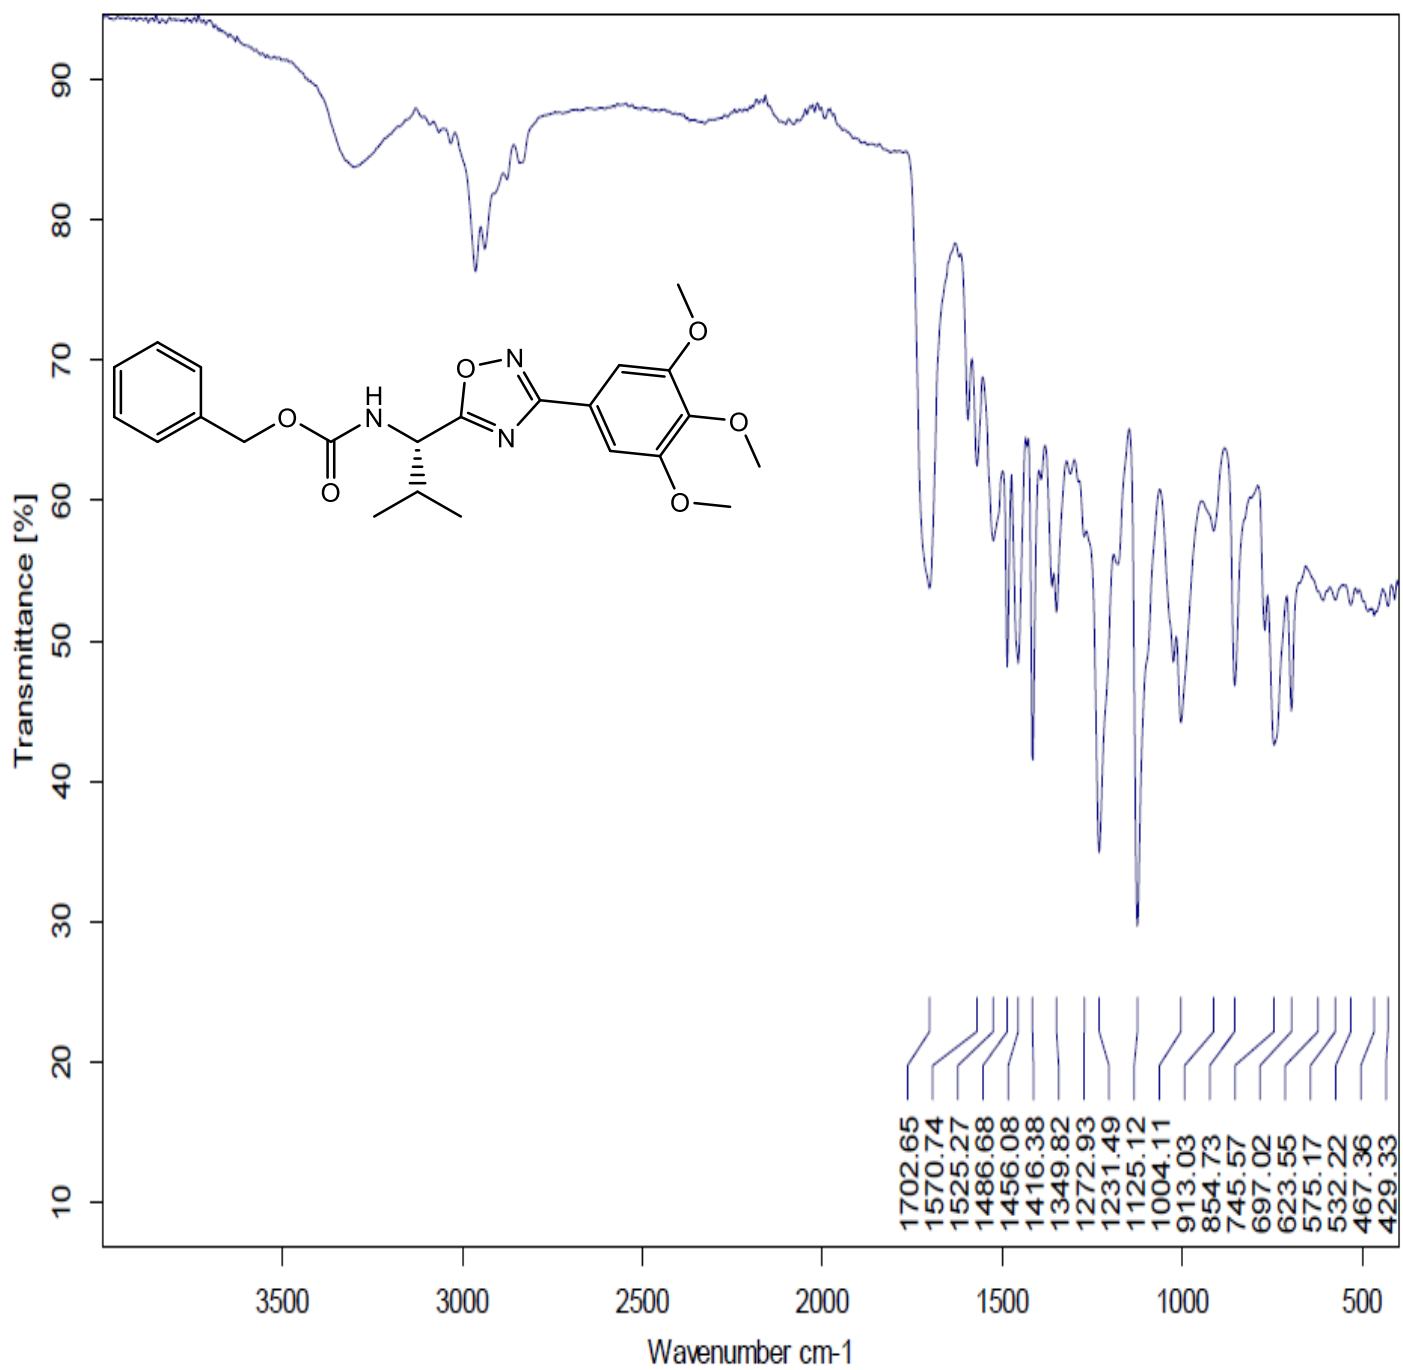

# 5k

D-rana-Leu-1H

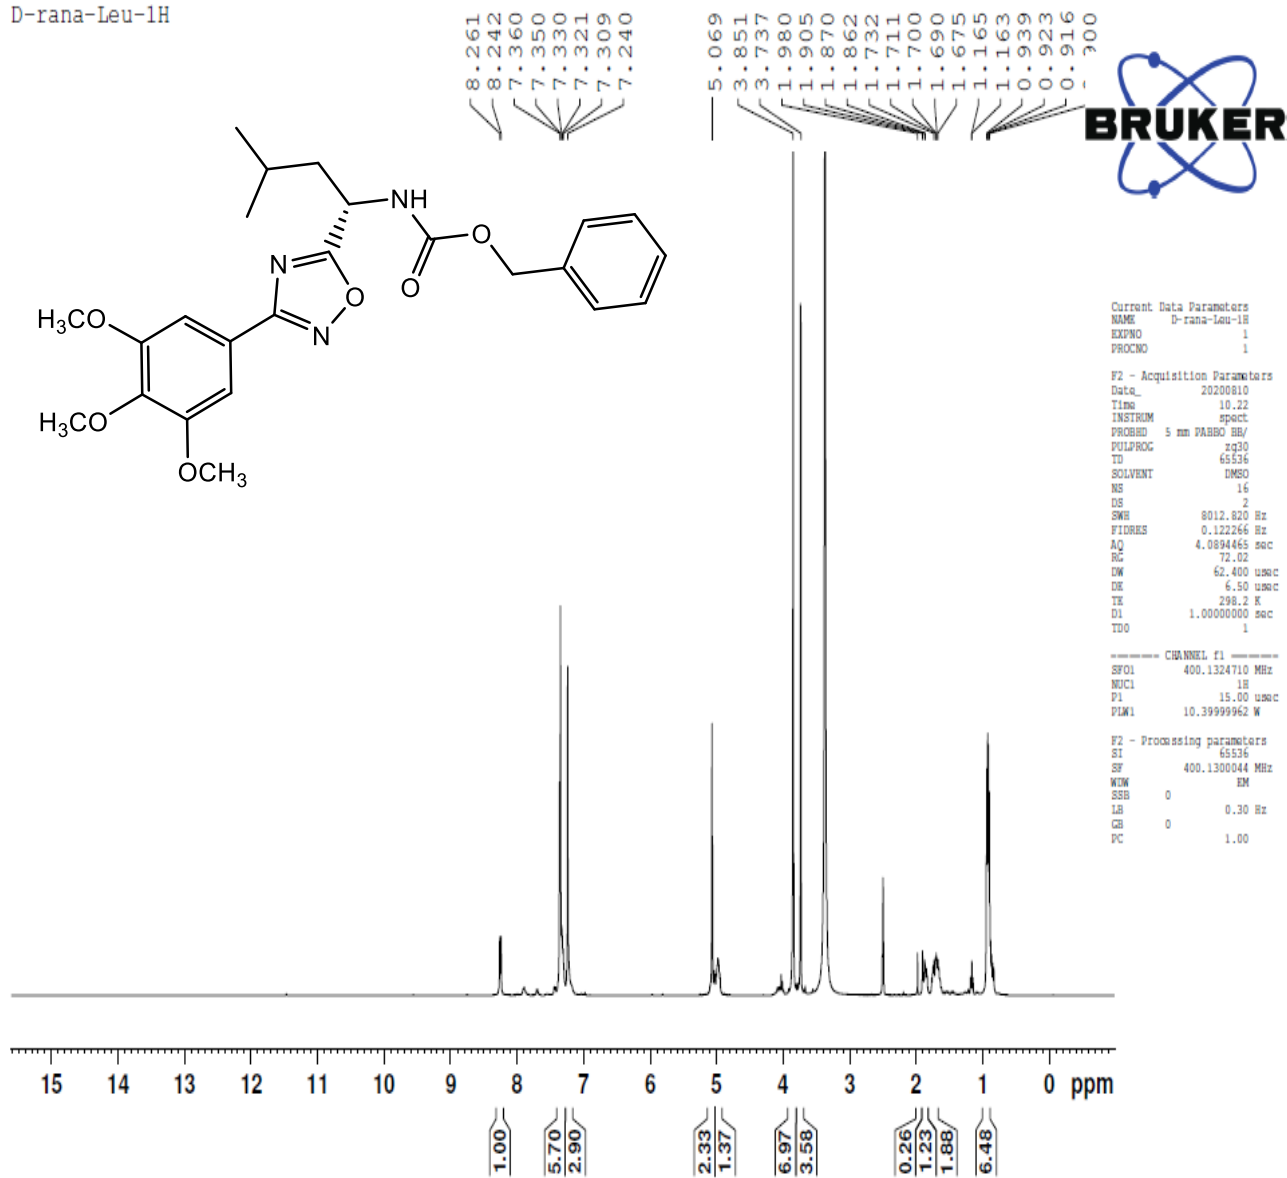

# 5k

D-rana-Leu-cl3

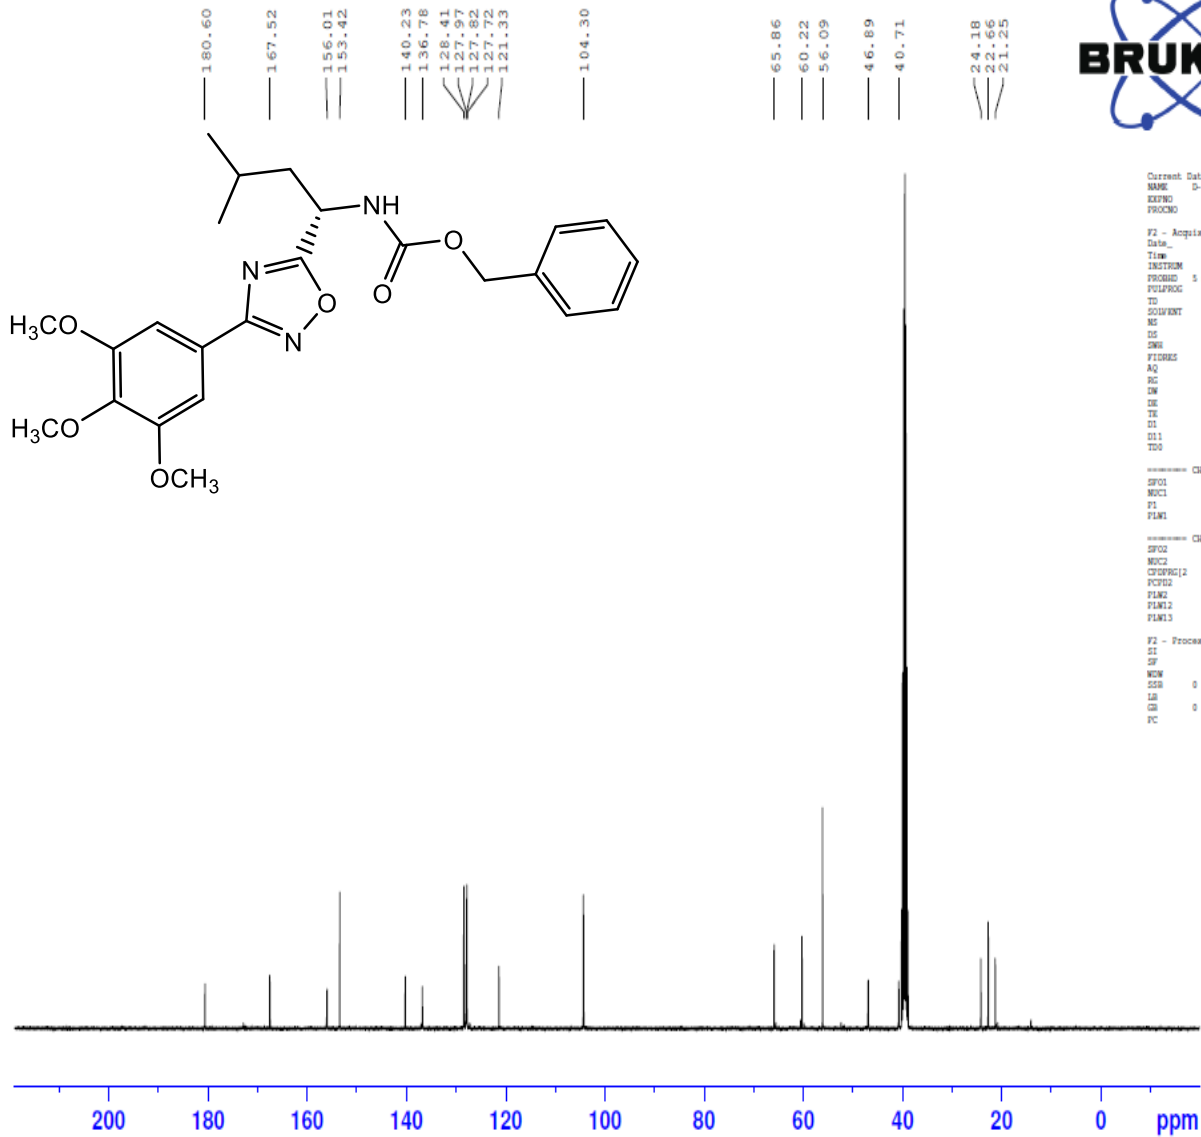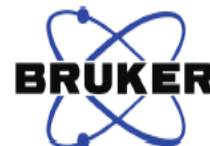

Current Data Parameters  
NAME D-rana-leu-cl3  
EXPNO 10  
PROCNO 1

F2 - Acquisition Parameters  
Date\_ 20200811  
Time 10.31  
INSTRUM spect  
PROBHD 5 mm PABBO BB/  
PULPROG zgpg30  
TD 65536  
SOLVENT DMSO  
NS 1500  
DS 4  
SWH 24038.461 Hz  
FIDRES 0.364798 Hz  
AQ 1.3621488 sec  
RG 201.61  
DN 20.800 usec  
DE 6.50 usec  
TE 298.2 K  
D1 2.0000000 sec  
D11 0.0300000 sec  
TD0 1

===== CHANNEL f1 =====  
SF01 100.6228293 MHz  
NUC1 13C  
P1 10.00 usec  
PLM1 50.0000000 W

===== CHANNEL f2 =====  
SF02 400.1316005 MHz  
NUC2 1H  
CYCPRG2 waltz16  
PCPD2 50.00 usec  
PLM2 10.3999962 W  
PLM12 0.20889000 W  
PLM13 0.21400000 W

F2 - Processing parameters  
SI 32768  
SF 100.6128118 MHz  
WDW EM  
SSB 0  
LB 1.00 Hz  
GB 0  
PC 1.40

# Elemental analysis report

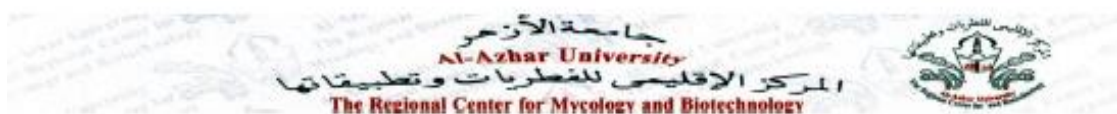

## Requester Data:

Name: Dr. Rana Tarek Diab  
Authority: Faculty of Pharmacy, Zaga Zig University

## Sample Data:

Nine samples had been submitted for elemental analysis.

## Analysis Report:

| Sample Code | C%    | H%   | N%    | S% |
|-------------|-------|------|-------|----|
| 5h          | 60.71 | 6.68 | 10.28 | 0  |
| 5k          | 63.39 | 6.48 | 9.47  | 0  |
| 5i          | 62.75 | 6.42 | 9.73  | 0  |
| 5f          | 60.39 | 5.52 | 10.79 | 0  |
| L           | 67.84 | 8.95 | 7.31  | 0  |
| 5i          | 71.32 | 8.95 | 6.17  | 0  |
| 5c          | 62.50 | 5.41 | 13.10 | 0  |
| Mi          | 69.04 | 9.28 | 6.85  | 0  |
| Ni          | 61.09 | 4.97 | 13.68 | 0  |

INVESTIGATOR  DIRECTOR 



تليفون: ٢٢٦٢٠٣٧٣ (٠٢٠٧) فاكس: ٢٢٦٢٠٣٧٣ (٠٢٠٧)  
http://www.azhar.edu.eg.htm  
http://www.azhar.edu.eg/pages/fungi\_center.htm  
Facebook: RCMB AZHAR

شارع المسليم الدائم - مدينة نصر - القاهرة  
البريد الإلكتروني: remb@azhar.edu.eg  
الموقع الإلكتروني:  
شعولي بريد ١١٧٤١ مدينة نصر القاهرة



**Requester Data:**

Name: Dr. Rana Tarek Diab  
Authority: Faculty of Pharmacy, Zaga Zig University

**Sample Data:**

Ten samples had been submitted for elemental analysis.

**Analysis Report:**

| Sample Code | C%    | H%   | N%    | S%    |
|-------------|-------|------|-------|-------|
| N-T-D       | 55.70 | 5.49 | 6.83  | 7.51  |
| N-T-L       | 55.68 | 5.52 | 9.91  | 21.98 |
| <b>5b</b>   | 62.16 | 5.37 | 13.12 | 0     |
| OL          | 71.38 | 9.52 | 6.17  | 0     |
| <b>5d</b>   | 62.19 | 5.40 | 13.08 | 0     |
| Ph          | 65.16 | 5.38 | 9.13  | 0     |
| <b>5a</b>   | 66.43 | 5.79 | 8.81  | 0     |
| <b>5g</b>   | 63.38 | 5.43 | 8.40  | 0     |
| S           | 70.71 | 9.85 | 6.13  | 0     |
| <b>5e</b>   | 59.89 | 5.63 | 7.22  | 0     |

INVESTIGATOR



DIRECTOR

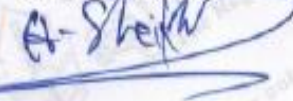

# One dose assay graph for compounds 5a-k

5a

Developmental Therapeutics Program

NSC: D-824575 / 1    Conc: 1.00E-5 Molar    Test Date: Aug 17, 2020

One Dose Mean Graph

Experiment ID: 2008OS33    Report Date: Sep 05, 202

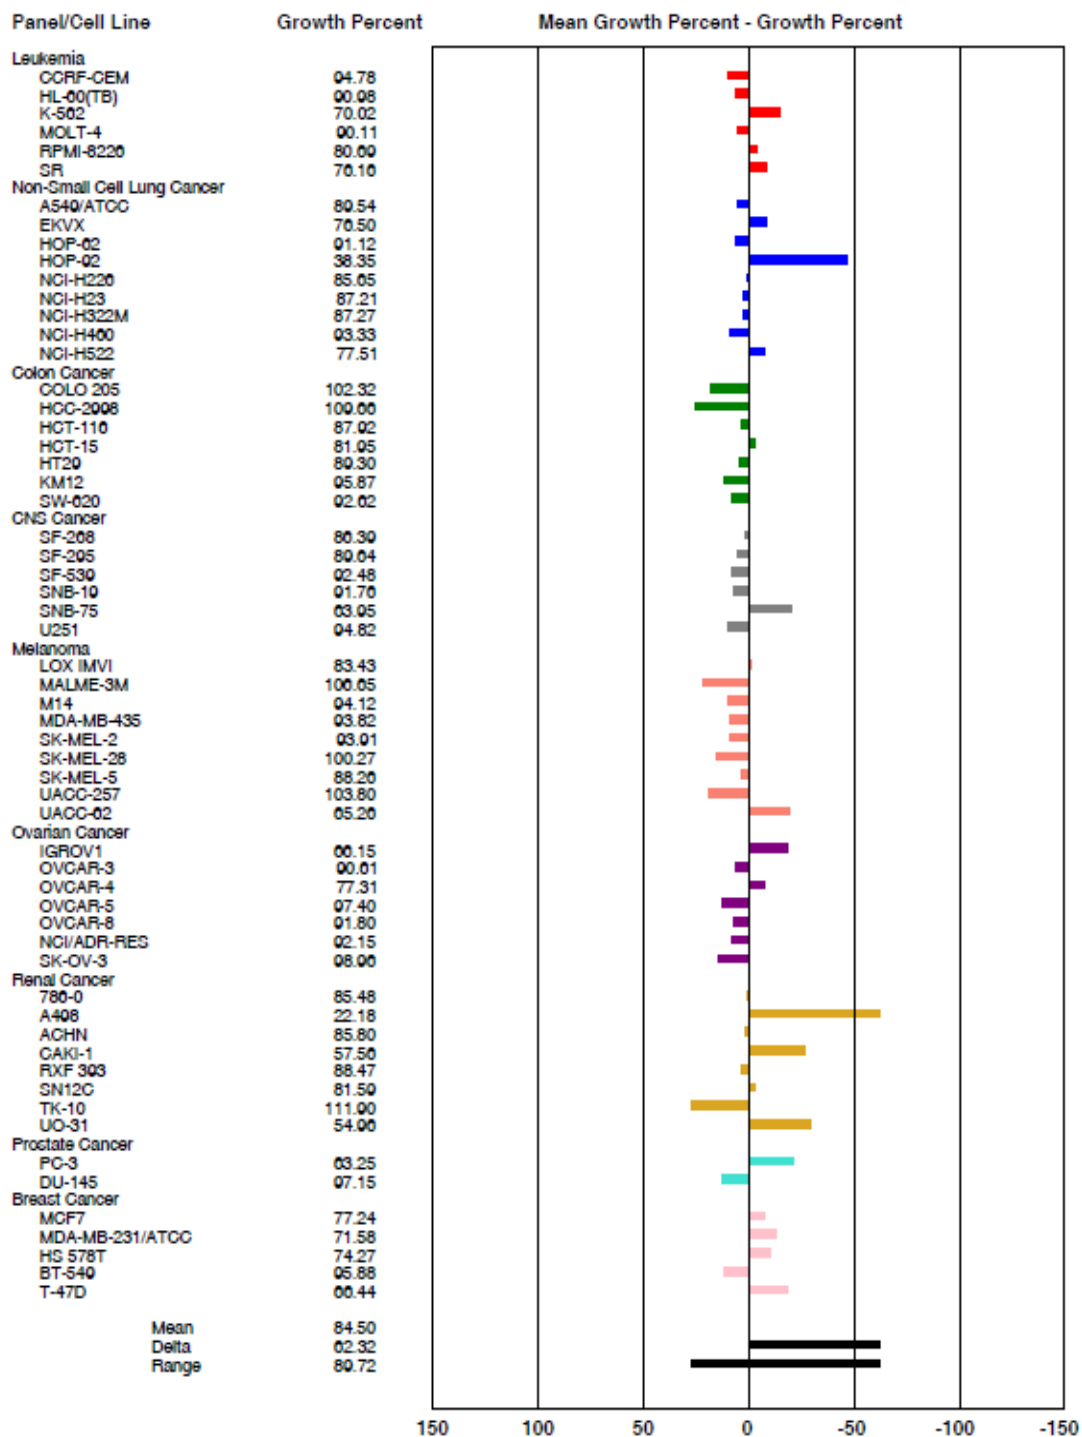

# 5b

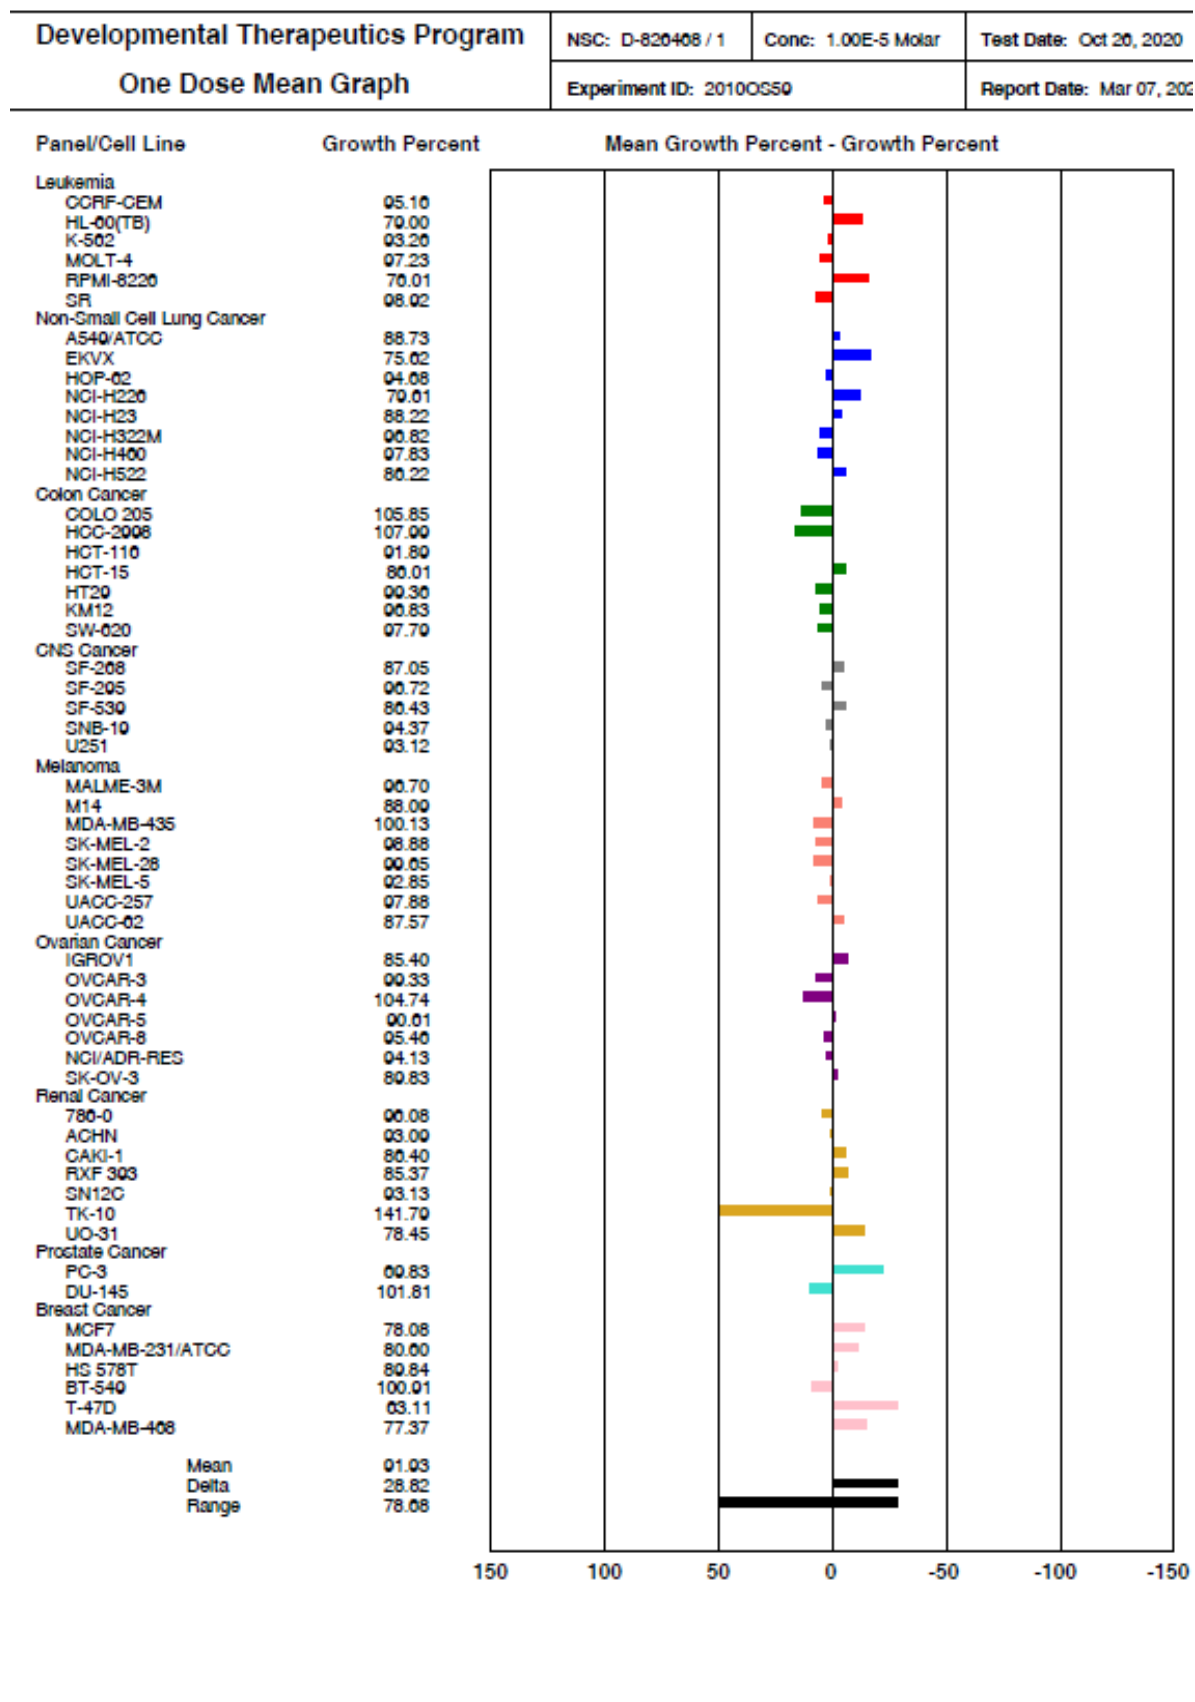

# 5c

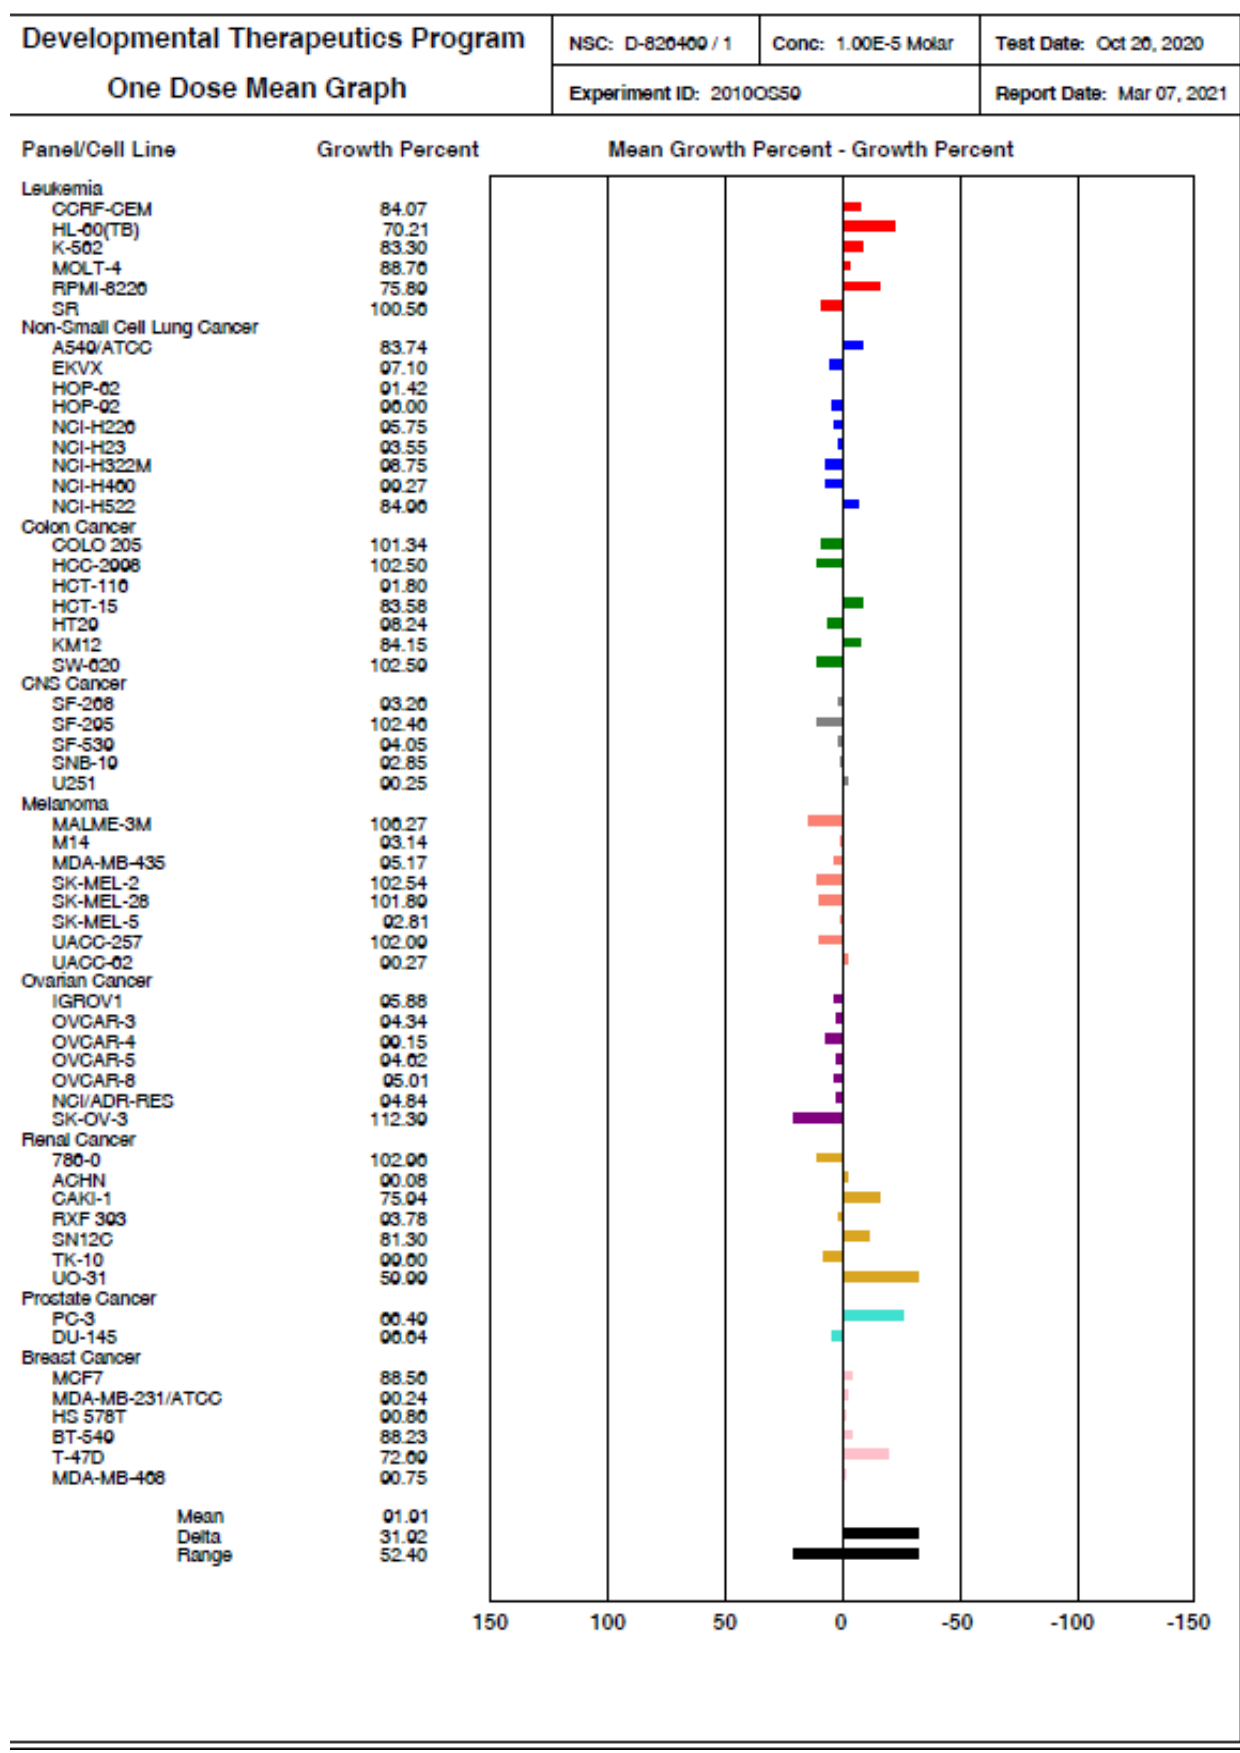

# 5d

|                                                           |                         |                     |                           |
|-----------------------------------------------------------|-------------------------|---------------------|---------------------------|
| Developmental Therapeutics Program<br>One Dose Mean Graph | NSC: D-824578 / 1       | Conc: 1.00E-5 Molar | Test Date: Aug 17, 2020   |
|                                                           | Experiment ID: 2008OS33 |                     | Report Date: Sep 05, 2020 |

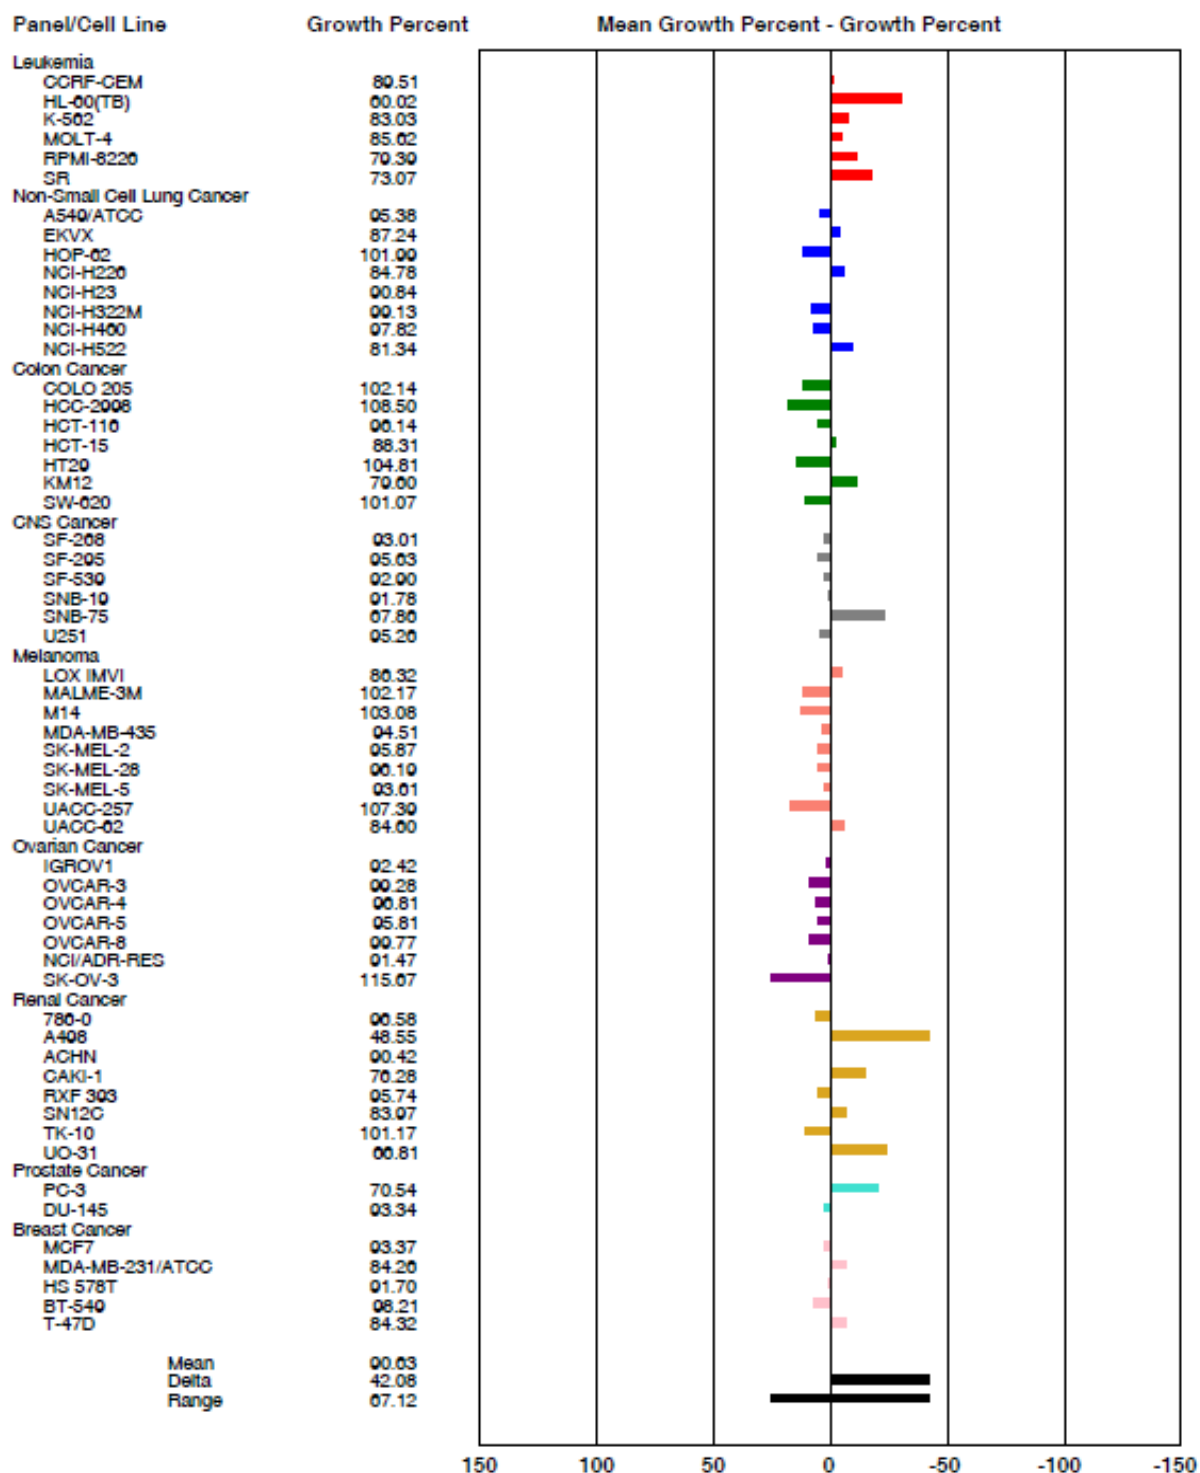

# 5e

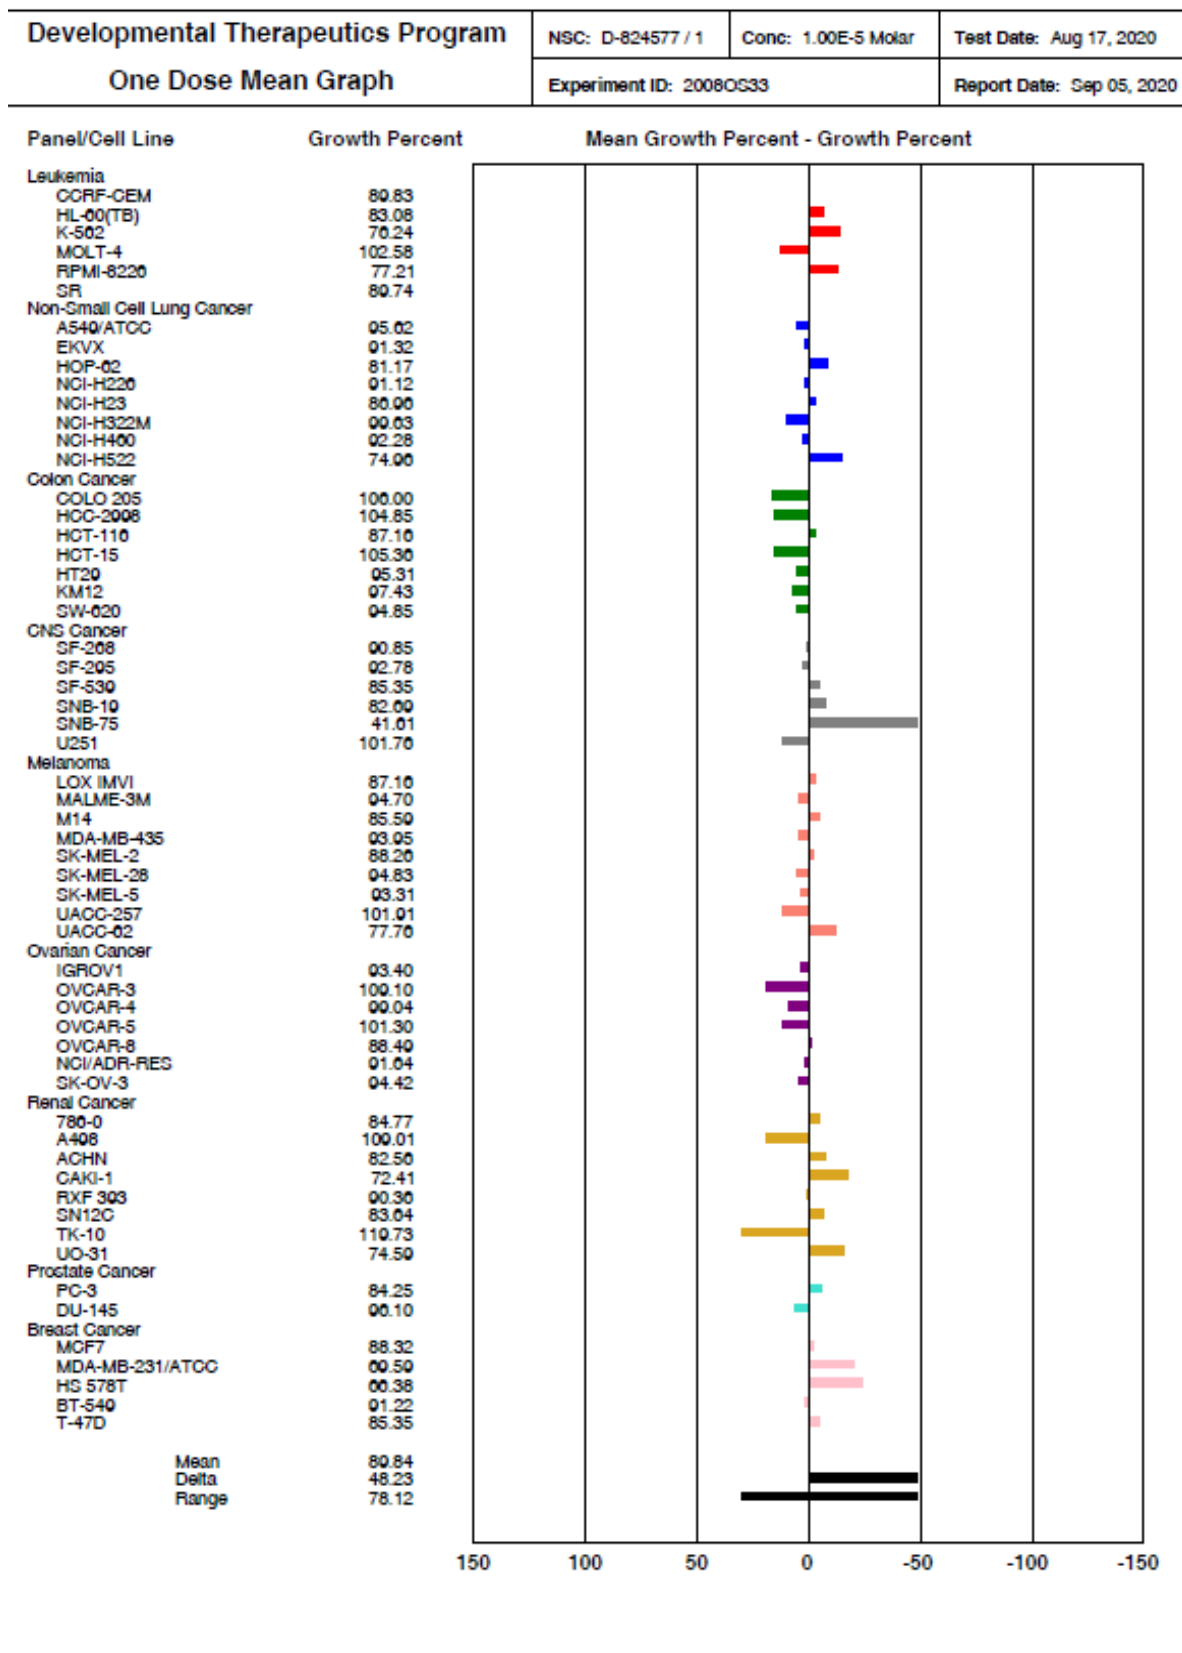

# 5f

|                                                           |                         |                     |                           |
|-----------------------------------------------------------|-------------------------|---------------------|---------------------------|
| Developmental Therapeutics Program<br>One Dose Mean Graph | NSC: D-824574 / 1       | Conc: 1.00E-5 Molar | Test Date: Aug 17, 2020   |
|                                                           | Experiment ID: 2008OS33 |                     | Report Date: Sep 05, 2020 |

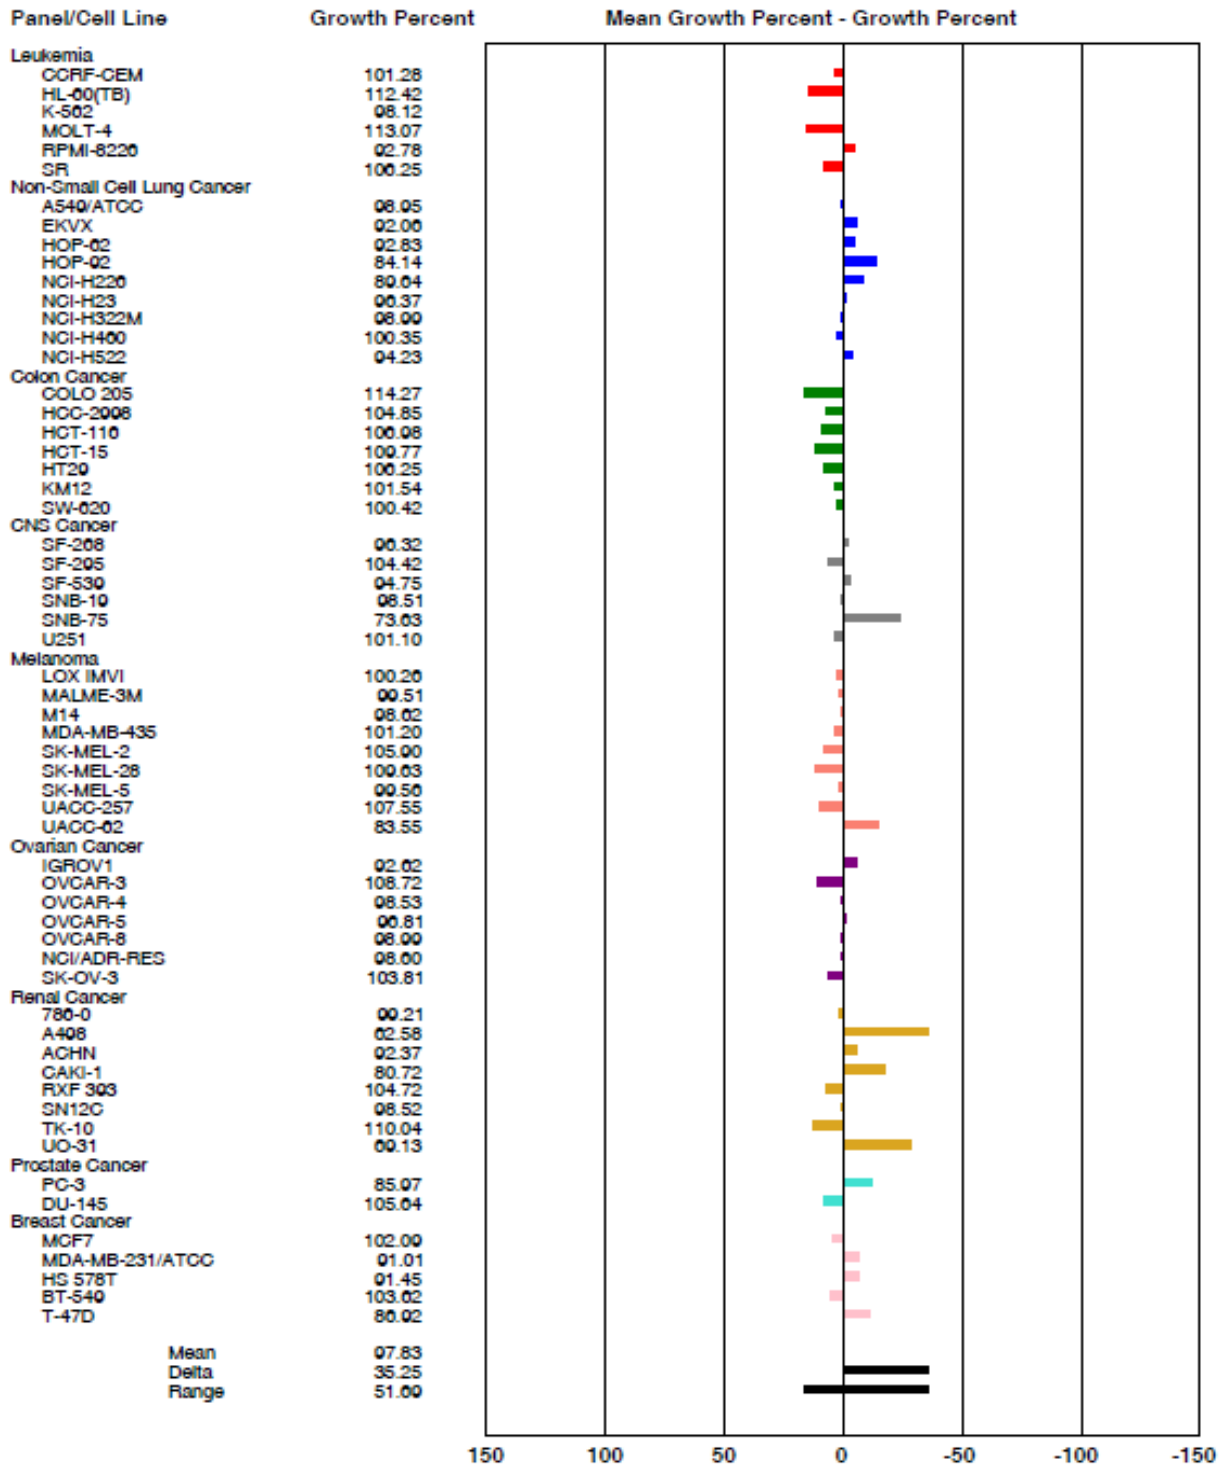



5g

|                                                           |                         |                     |                           |
|-----------------------------------------------------------|-------------------------|---------------------|---------------------------|
| Developmental Therapeutics Program<br>One Dose Mean Graph | NSC: D-820470 / 1       | Conc: 1.00E-5 Molar | Test Date: Oct 20, 2020   |
|                                                           | Experiment ID: 20100350 |                     | Report Date: Mar 07, 2021 |

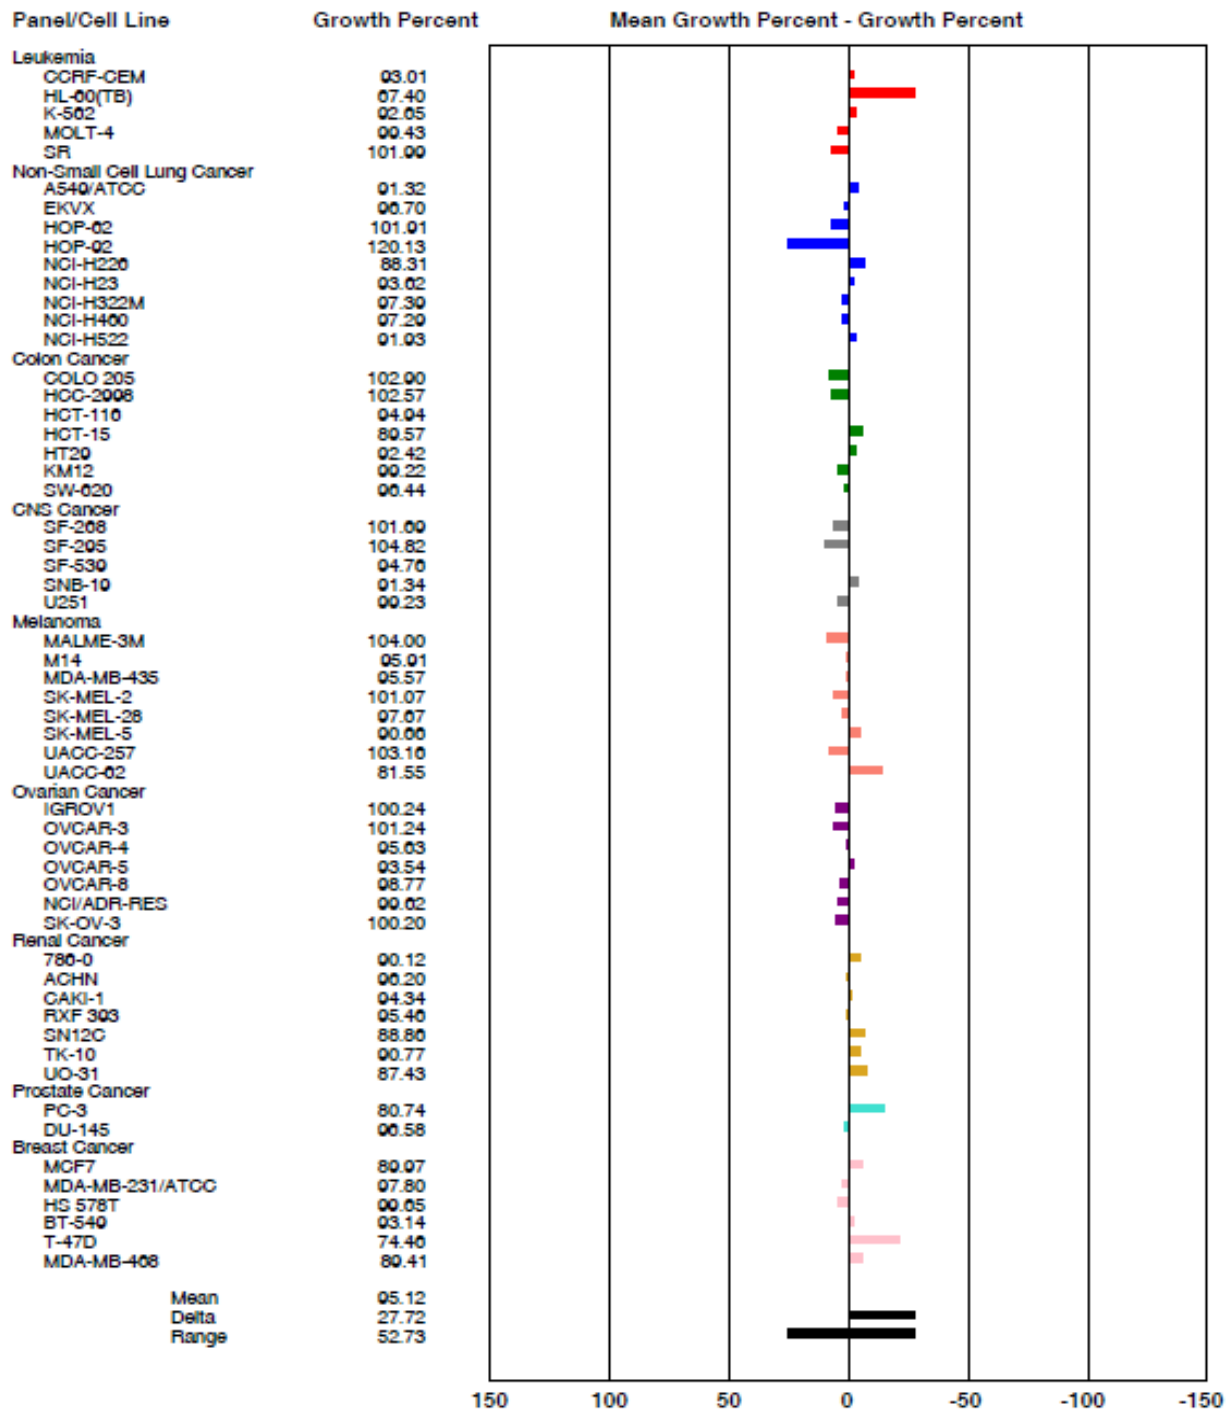



# 5h

|                                                           |                         |                     |                           |
|-----------------------------------------------------------|-------------------------|---------------------|---------------------------|
| Developmental Therapeutics Program<br>One Dose Mean Graph | NSC: D-824572 / 1       | Conc: 1.00E-5 Molar | Test Date: Aug 17, 2020   |
|                                                           | Experiment ID: 20080S33 |                     | Report Date: Sep 05, 2020 |

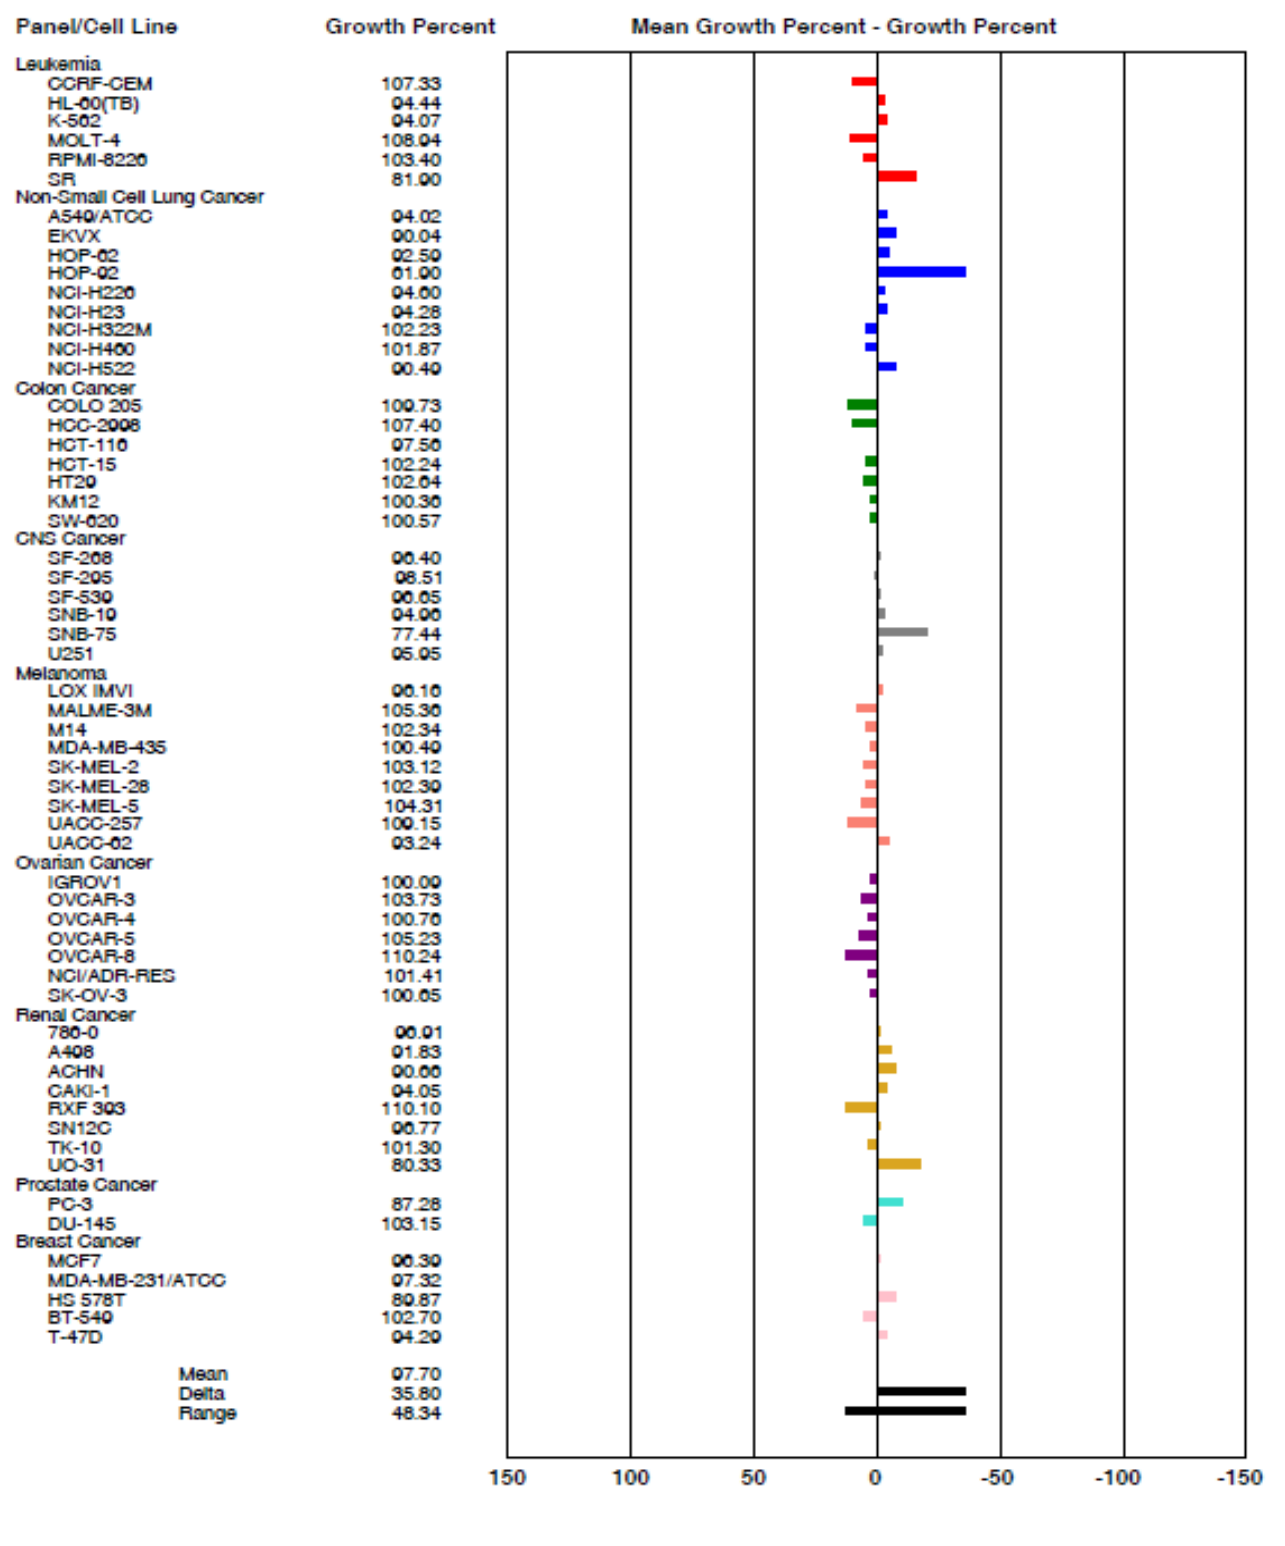

|                                                           |                         |                     |                           |
|-----------------------------------------------------------|-------------------------|---------------------|---------------------------|
| Developmental Therapeutics Program<br>One Dose Mean Graph | NSC: D-820785 / 1       | Conc: 1.00E-5 Molar | Test Date: Nov 02, 2020   |
|                                                           | Experiment ID: 20110501 |                     | Report Date: Mar 07, 2021 |

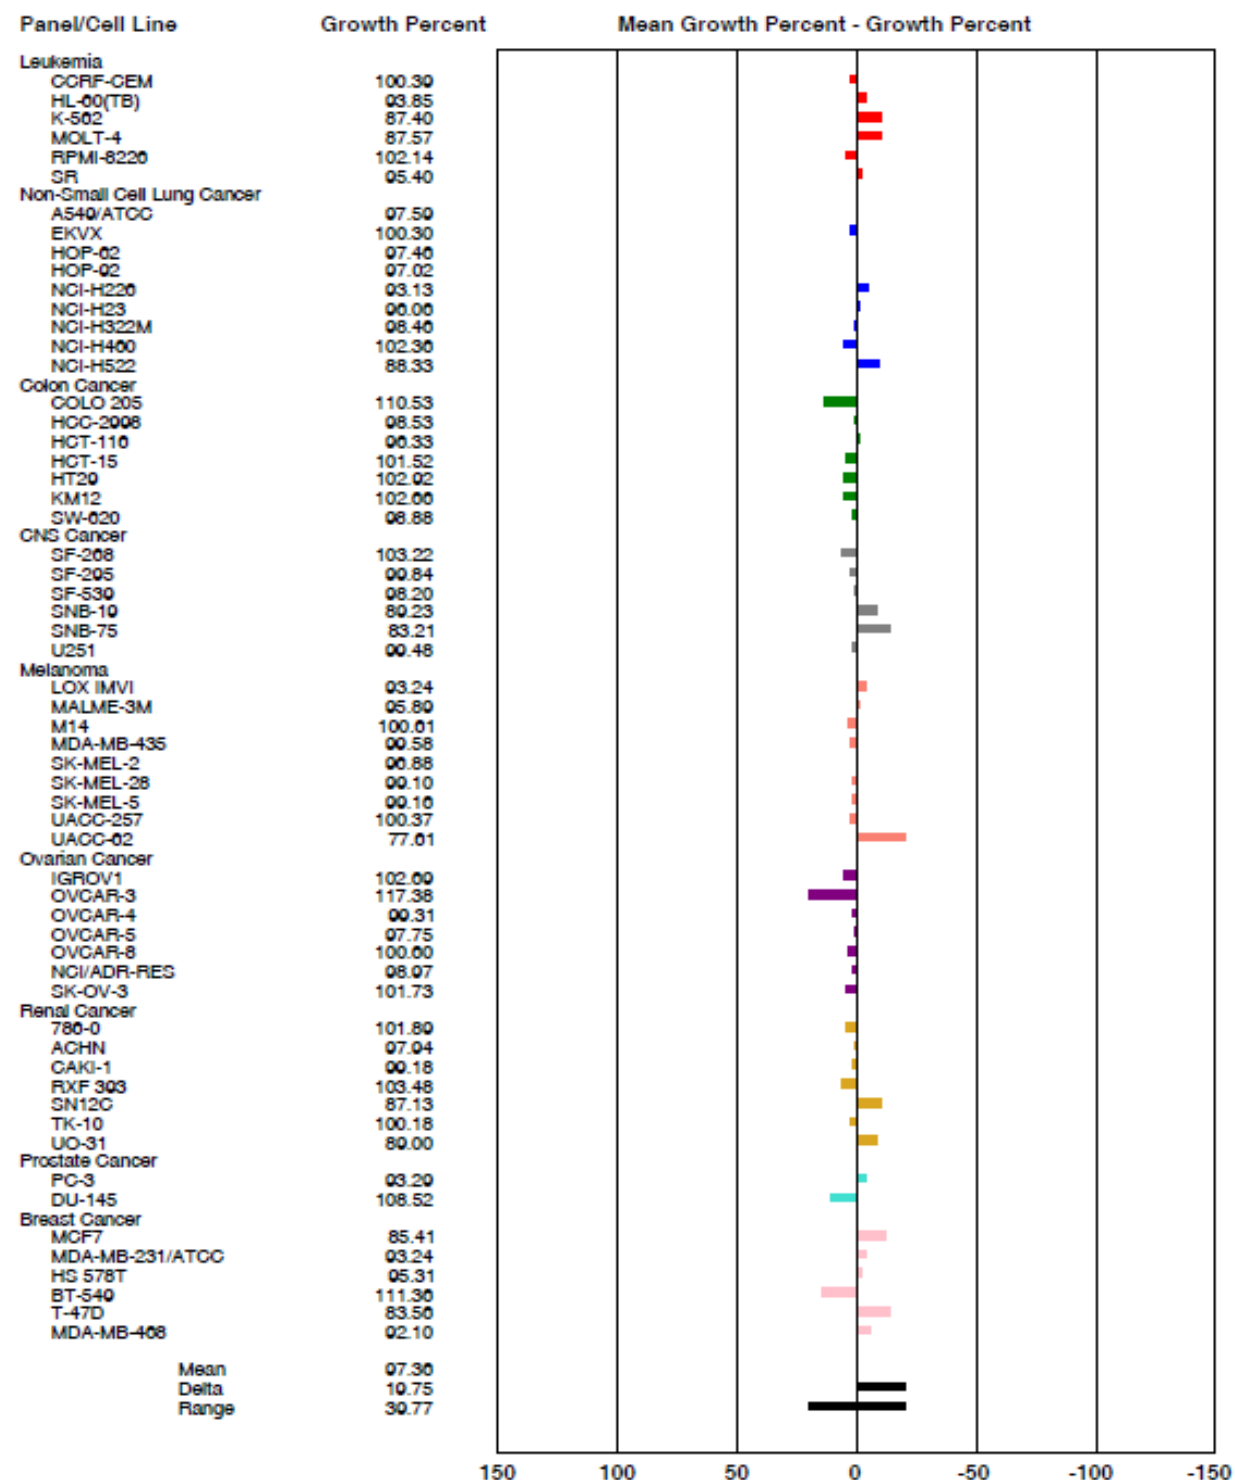

# 5j

|                                                           |                         |                     |                           |
|-----------------------------------------------------------|-------------------------|---------------------|---------------------------|
| Developmental Therapeutics Program<br>One Dose Mean Graph | NSC: D-820780 / 1       | Conc: 1.00E-5 Molar | Test Date: Nov 02, 2020   |
|                                                           | Experiment ID: 20110501 |                     | Report Date: Mar 07, 2021 |

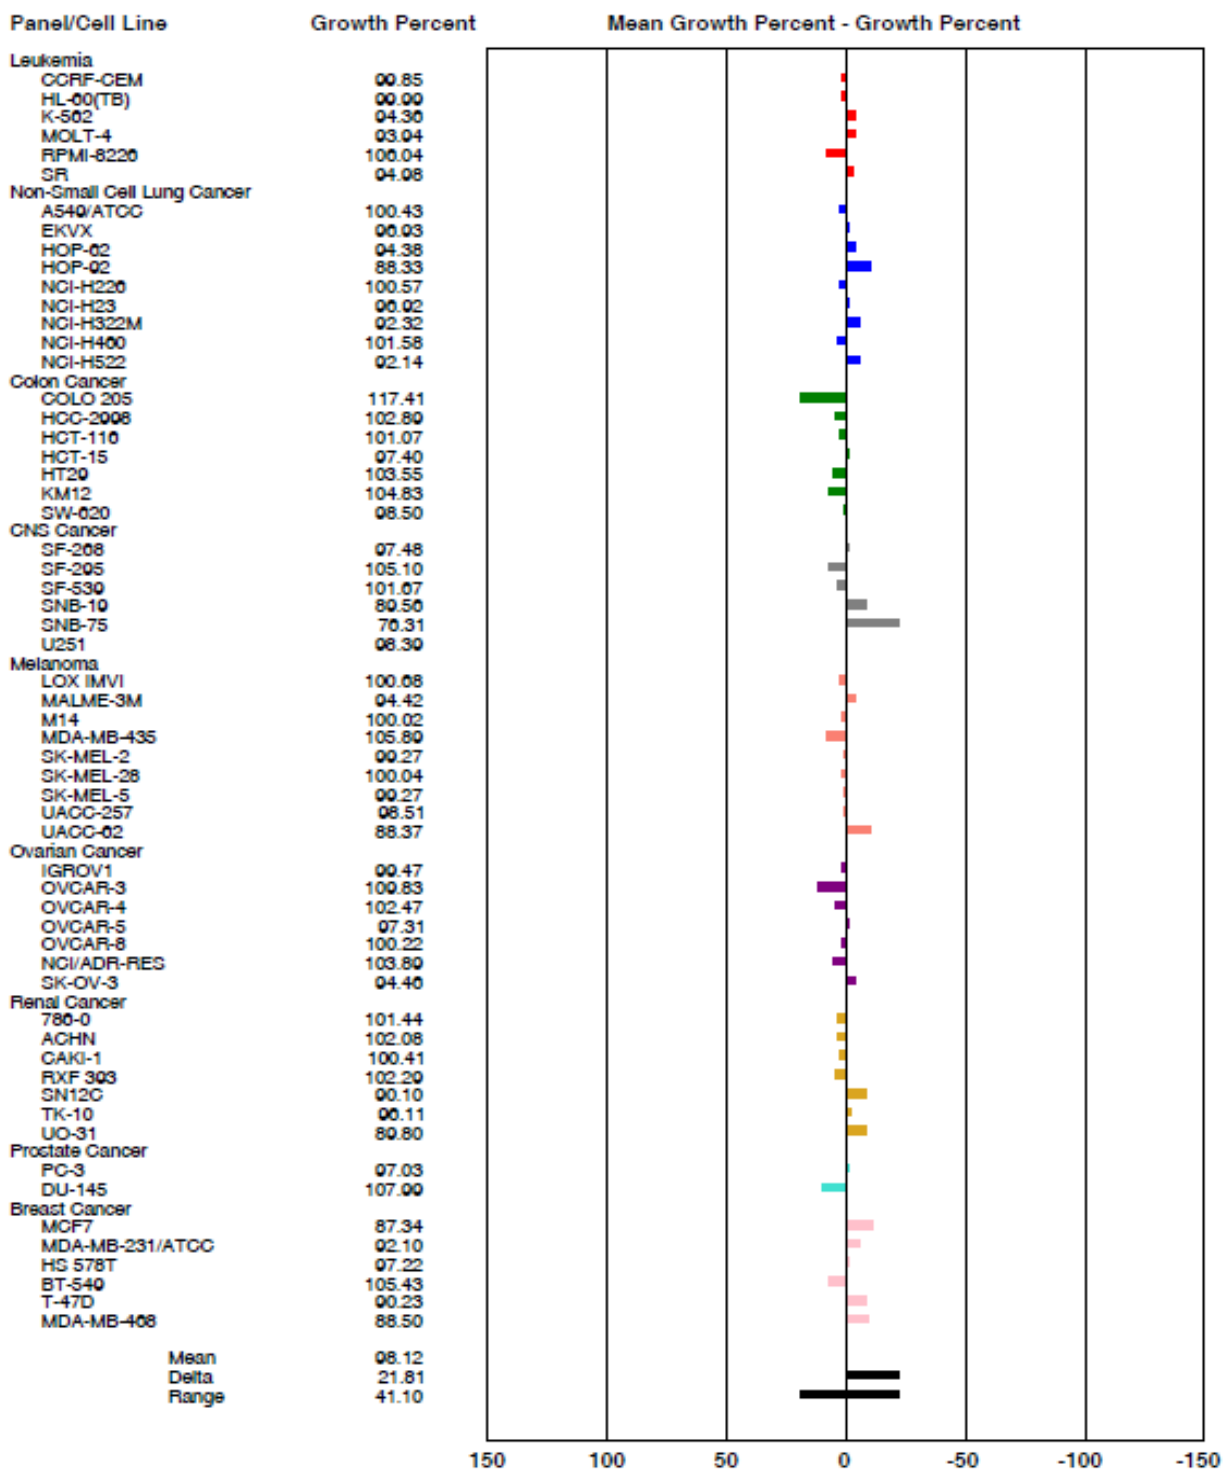

|                                                           |                         |                     |                           |
|-----------------------------------------------------------|-------------------------|---------------------|---------------------------|
| Developmental Therapeutics Program<br>One Dose Mean Graph | NSC: D-820787 / 1       | Conc: 1.00E-5 Molar | Test Date: Nov 02, 2020   |
|                                                           | Experiment ID: 20110S01 |                     | Report Date: Mar 07, 2021 |

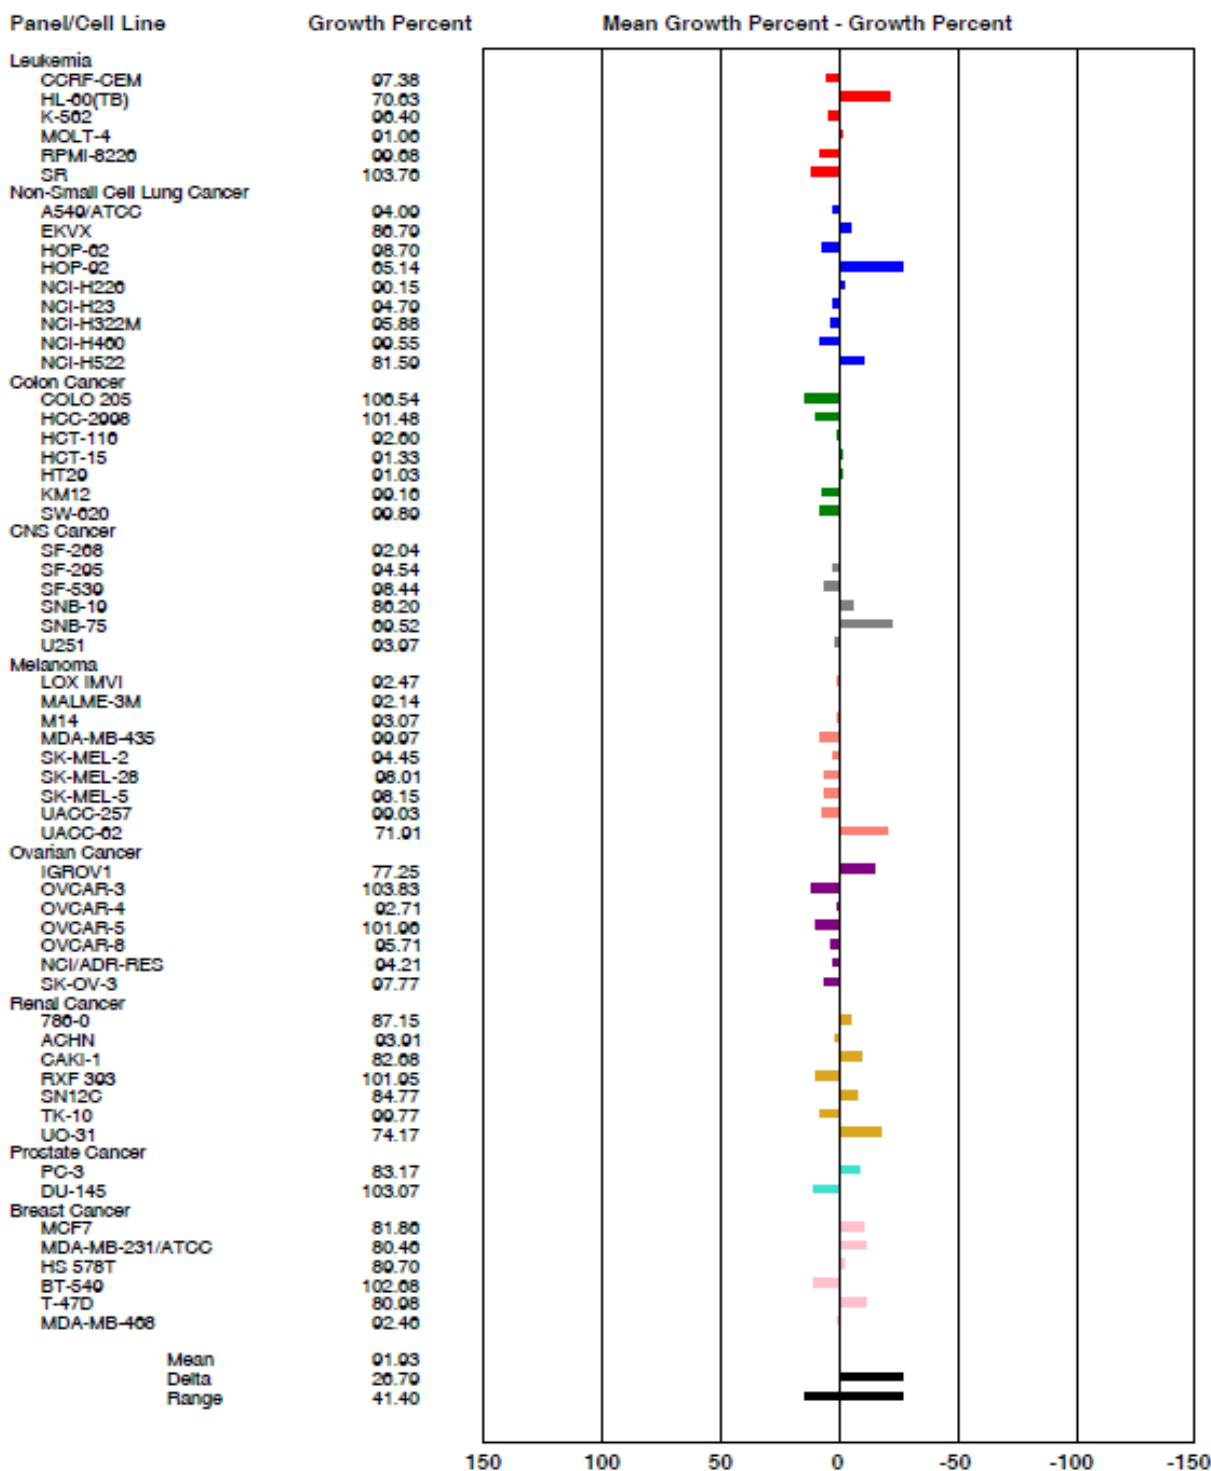

# Tubulin polymerization report

|                   |                                                                                                  |                                                               |      |
|-------------------|--------------------------------------------------------------------------------------------------|---------------------------------------------------------------|------|
| <b>Researcher</b> | : Dr..Rana Tarek                                                                                 | email: <a href="mailto:r.diab@zu.edu.eg">r.diab@zu.edu.eg</a> | mob. |
| <b>Assay</b>      | : Tubulin enzyme assay                                                                           |                                                               |      |
| <b>Samples</b>    | : 2 compounds                                                                                    |                                                               |      |
| <b>Ref.</b>       | : ---                                                                                            |                                                               |      |
| <b>Date</b>       | : 09-03-2018                                                                                     |                                                               |      |
| <b>Reader</b>     | : Tecan-Spark reader                                                                             |                                                               |      |
| <b>Kit used</b>   | : Cloud-clone <a href="#">corp</a> ) SEB870Hu EIA Kit For Tubulin Beta ( <a href="#">TUBb</a> ). |                                                               |      |
| <b>Solvent</b>    | : DMSO                                                                                           |                                                               |      |

## Lab Report

| ser | Compound                   |              | Tubulin Binding | SD<br>± |
|-----|----------------------------|--------------|-----------------|---------|
|     | ID                         | M.W<br>g/mol | IC50<br>uM      |         |
| 1   | <a href="#">pha</a>        | 489          | 1.18            | 0.037   |
| **  | <a href="#">Colchicine</a> | 399          | 2.37            | 0.075   |

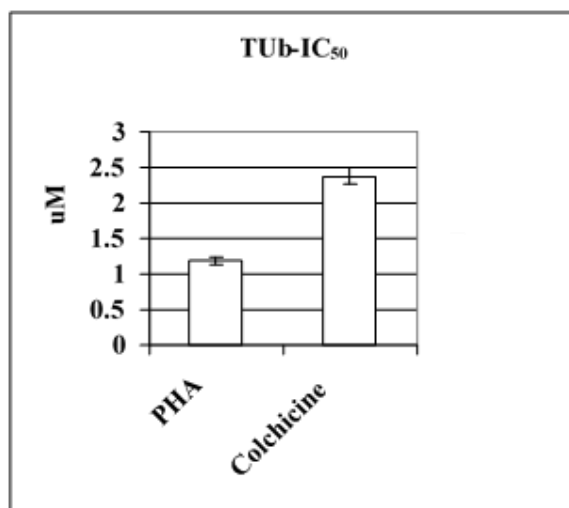

Supplement: d1nj02885e1.pdf [file d1nj02885e1.pdf]
